# Supplementary material for: Leadership competencies for medical education and healthcare professions: population-based study
Source: PubMed Central journal article supplement — BMJ Open. 2012 Mar 27;2(2):e000812. doi: 10.1136/bmjopen-2012-000812 (PMC3323822; doi:10.1136/bmjopen-2012-000812), 2012-03-27
Supplement: bmjopen-2012-000812.draft_revisions.pdf [file bmjopen-2012-000812.draft_revisions.pdf]

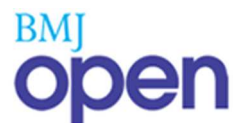

**Leadership competencies for medical education and healthcare professions: population based study**

|                                 |                                                                                                                                                                                                                                                                                                                                                                                                                                                 |
|---------------------------------|-------------------------------------------------------------------------------------------------------------------------------------------------------------------------------------------------------------------------------------------------------------------------------------------------------------------------------------------------------------------------------------------------------------------------------------------------|
| Journal:                        | <i>BMJ Open</i>                                                                                                                                                                                                                                                                                                                                                                                                                                 |
| Manuscript ID:                  | bmjopen-2012-000812                                                                                                                                                                                                                                                                                                                                                                                                                             |
| Article Type:                   | Research                                                                                                                                                                                                                                                                                                                                                                                                                                        |
| Date Submitted by the Author:   | 02-Jan-2012                                                                                                                                                                                                                                                                                                                                                                                                                                     |
| Complete List of Authors:       | Citaku, Fadil; University Ambrosiana, International Graduate Medical Education<br>Violato, Claudio; University of Calgary, Medical Education and Research Unit<br>Beran, Tanya; University of Calgary, Medical Education Research Unit<br>Donnon, Tyrone; University of Calgary, Medical Education Research Unit<br>Hecker, Kent; University of Calgary, Medical Education Research Unit<br>Cawthorpe, David; University of Calgary, Psychiatry |
| <b>Primary Subject Heading</b>: | Medical education and training                                                                                                                                                                                                                                                                                                                                                                                                                  |
| Secondary Subject Heading:      | Medical management                                                                                                                                                                                                                                                                                                                                                                                                                              |
| Keywords:                       | MEDICAL EDUCATION & TRAINING, HEALTH SERVICES ADMINISTRATION & MANAGEMENT, MEDICAL ETHICS                                                                                                                                                                                                                                                                                                                                                       |
|                                 |                                                                                                                                                                                                                                                                                                                                                                                                                                                 |

SCHOLARONE™  
Manuscripts

1  
2  
3 **Leadership competencies for medical education and healthcare professions: population**  
4  
5 **based study**  
6  
7

8 Fadil Çitaku, PhD<sup>1,2,3</sup>, Claudio Violato, PhD<sup>1,2</sup>, Tanya Beran, PhD<sup>1,2</sup>, Tyrone Donnon,  
9 PhD<sup>1,2</sup>, Kent Hecker, PhD<sup>1,2</sup> and David Cawthorpe, PhD<sup>1,2</sup>  
10  
11

12  
13  
14 <sup>1</sup>Medical Education and Research Unit  
15 Faculty of Medicine, University of Calgary  
16 Calgary, AB Canada T2N 4N1  
17

18  
19  
20 <sup>2</sup>International Graduate Medical Education  
21 University Ambrosiana  
22 Milan, Italy  
23

24 <sup>3</sup>School of Higher Education Health and Socials  
25 Südalle 22, CH-5001 Aarau, Switzerland  
26  
27

28 **Corresponding Author**  
29

30 Claudio Violato, PhD  
31 Professor, Department of Community Health Sciences  
32 Director, Medical Education and Research Unit  
33 Faculty of Medicine, University of Calgary  
34 Calgary, AB Canada T2N 4N1  
35 [violato@ucalgary.ca](mailto:violato@ucalgary.ca)  
36 phone: 403-220-7296  
37 fax: 403-210-7507  
38  
39

40 **Keywords:** leadership competencies, medical education, medical leaders, principal  
41  
42 component analyses  
43  
44

45 **Word count:** 3,601  
46  
47  
48  
49  
50  
51  
52  
53  
54  
55  
56  
57  
58  
59  
60

### Article Focus

- The major focus was to identify and empirically investigate the dimensions of leadership in medical education and healthcare professions
- A 63 item survey was developed and administered via electronic mail to 229 health care professional educators and leaders in six countries (Austria, Canada, Germany, Switzerland, the United Kingdom, and the United States of America)

### Key Messages

- Exploratory principal component analyses yielded 5 dimensions of leadership: (1) Social Responsibility, (2) Innovation, (3) Self Management, (4) Task Management, and (5) Justice Orientation
- Social Responsibility was rated higher by other health professionals compared to physicians, as was Innovation, and Justice Orientation

### Strengths and Limitations

- The results of the principal component analyses support the theoretical meaningfulness of these factors, their coherence, internal consistency and parsimony in explaining the variance of the data
- Our 5-factor leadership competency model needs to be replicated and extended with larger representative samples from other cultures
- Notwithstanding the limitations of the present study, it is one of the few that has explicitly defined and provided empirical evidence for leadership competencies considered to be the most important in medical education.

**ABSTRACT**

**Objective:** To identify and empirically investigate the dimensions of leadership in medical education and healthcare professions.

**Design:** A population based design with a focus group and a survey were used to identify the perceived competencies for effective leadership in medical education.

**Setting:** The focus group, consisting of 5 experts from three countries (Austria n=1; Germany n=2; Switzerland n=2), was conducted (all masters of medical education) and the survey was sent to health professionals from medical schools and teaching hospitals in six countries (Austria, Canada, Germany, Switzerland, the United Kingdom, and the United States of America).

**Participants:** The participants were educators, physicians, nurses, and other health professionals who held academic positions in medical education. A total of 229 completed the survey; 135 (59.0%) women (age M = 50.3 years) and 94 (41.0%) men (mean age = 51.0 years).

**Measures:** A 63 item survey measuring leadership competencies was developed and administered via electronic mail to participants.

**Results:** Exploratory principal component analyses yielded 5 factors accounting for 51.2% of the variance: (1) Social Responsibility, (2) Innovation, (3) Self Management, (4) Task Management, and (5) Justice Orientation. There were significant differences between physicians and other health professionals on some factors (Wilk's lambda = 0.93,  $p < 0.01$ ). Social Responsibility was rated higher by other health professionals (M=71.09) than by physicians (M=67.12), as was Innovation (health professionals M=80.83; physicians M=76.20), and Justice Orientation (health professionals M=21.27; physicians M=20.46).

**Conclusions:** The results of the principal component analyses support the theoretical meaningfulness of these factors, their coherence, internal consistency and parsimony in

1  
2  
3 explaining the variance of the data. Although there are some between-group differences, the  
4  
5 competencies appear to be stable and coherent.  
6  
7  
8  
9  
10  
11  
12  
13  
14  
15  
16  
17  
18  
19  
20  
21  
22  
23  
24  
25  
26  
27  
28  
29  
30  
31  
32  
33  
34  
35  
36  
37  
38  
39  
40  
41  
42  
43  
44  
45  
46  
47  
48  
49  
50  
51  
52  
53  
54  
55  
56  
57  
58  
59  
60

## Leadership competencies for medical education and healthcare professions: population based study

According to Bennis<sup>1</sup> – an expert in the study of leadership – an important threat facing the world today is the lack of effective leadership of our human institutions. Indeed, Lipman-Blumen<sup>2</sup> has called attention to the failure of leadership in government, universities, healthcare and financial institutions. Health organizations and medical schools – like other human institutions – need competent and effective leaders now more than ever to face the threats and challenges of the modern world<sup>3,4</sup>.

Long time scholars in the field of leadership, Vroom and Jago<sup>5</sup> defined leadership as a “process of motivating people to work together collaboratively to accomplish great things” (p. 18). Accordingly, leadership is a process, not a property of a person. It involves a particular form of influence called *motivating*, resulting in collaboration in pursuit of a common goal to achieve the great things that are in the minds of both leader and followers<sup>5</sup>. Identifying and defining the central competencies of leadership, however, remains elusive. The major purpose of the present study was to empirically investigate the core competencies for medical education leaders – an area that has not been systematically studied.

Leaders face many challenges in healthcare and medical education institutions<sup>6,7,8</sup>. Educational leaders are under scrutiny to achieve heightened expectations for improvement to teaching and learning. They are called to be educational visionaries, instructional and curriculum leaders, assessment experts, community builders, public relations experts, budget analysts, facility managers, special programs administrators, and expert overseers of legal, contractual, and policy mandates and initiatives. Yet, they encounter major challenges such as commercialization of the university's and medical school's central purpose, perceived lack of accountability of higher education, and heightened sensitivity of taxpayers toward ineffective and inefficient leadership in academia<sup>9</sup>. Medical school leaders, in addition, are confronted with many concerns such as financial stability, curriculum development, research

1  
2  
3 support, and accreditation standards. The ability to meet these demands may be compromised  
4  
5 as a result of inadequate and inefficient leadership.  
6

### 7 Leadership Theories

8  
9 In a recent (2011) meta-analysis of trait and behavioral theories of leadership, Derue  
10 Nahrgang, Wellman and Humphrey<sup>10</sup> concluded that much of the research evidence fails to  
11 provide an integrated framework for understanding what constitutes leadership effectiveness.  
12 They did empirically identify some leader traits and behaviors that represent effective  
13 leadership, however. The concept of leadership overlaps with two similar terms, management  
14 and administration. The former is used widely in Europe and Africa, while the latter is  
15 preferred in the United States, Canada and Australia. Leadership is often of great  
16 contemporary interest in most countries in the developed world<sup>11</sup>.  
17  
18  
19  
20  
21  
22  
23  
24  
25  
26

27 Some leadership researchers distinguish between leadership, administration and  
28 management. They suggest that leadership is synonymous with change while management  
29 and administration is considered as maintenance. All three dimensions are identified as  
30 critical functions of organizational activity. Taken together, leadership can be construed as a  
31 means of shaping the goals, motivations, and actions of others to initiate change or maintain  
32 stability<sup>12</sup>. Some researchers have adopted a social perspective to conceptualize leadership.  
33 Spillane, Halverson and Diamond<sup>13</sup>, for example, argued that leadership activity is defined or  
34 constructed through the interaction of leaders and followers during the execution of leadership  
35 tasks.  
36  
37  
38  
39  
40  
41  
42  
43  
44  
45  
46

### 47 The Importance of Effective Leadership

48  
49 Many authors<sup>14,15</sup> have argued that high-quality leadership is imperative to the success  
50 of educational institutions. Many researchers have emphasized idealized personal  
51 characteristics such as educational visionaries, instructional and curriculum leaders,  
52 assessment experts, community builders, public relations experts, budget analysts, facility  
53 managers, special programs administrators, and expert overseers of legal, contractual, and  
54  
55  
56  
57  
58  
59  
60

1  
2  
3 policy mandates and initiatives are thought to characterize effective leaders. The  
4  
5 preponderance of empirical evidence, however, does not support this trait model of leadership  
6  
7 effectiveness<sup>10</sup>. Although effective leaders can have a positive influence on achievement,  
8  
9 poor leaders can have a marginal or even negative impact on success<sup>14</sup>.  
10

11  
12 Waters and Grubb<sup>14</sup> in their meta-analytic study reported three major findings that  
13  
14 support the notion that school-level leadership matters in student achievement. First, they  
15  
16 found that principal leadership was correlated with student achievement; one standard  
17  
18 deviation improvement in principal leadership was associated with a 10 percentile increase in  
19  
20 student achievement. Second, they identified several leadership practices or processes  
21  
22 required to fulfill a number of responsibilities that were significantly and directly related to  
23  
24 student achievement. Third, they found a differential impact of leadership – just as leaders  
25  
26 can have a positive impact on student's achievement, they also can have marginal or, worse, a  
27  
28 negative impact on student's achievement.  
29  
30

31  
32 Wagner and colleagues operationalized leadership competencies based on a systematic  
33  
34 review of research in business practices, resulting in an inventory of over 107 specific  
35  
36 competencies<sup>17</sup>. These were categorized to obtain five major competencies including self  
37  
38 management that refers to personal insight and self-control; leading others involves  
39  
40 motivating others to set and meet goals; task management includes effective and efficient  
41  
42 completion of prioritized duties; innovation describes developing a vision and responding to  
43  
44 opportunities; and social responsibility entails promoting integrity. It is not yet known  
45  
46 whether these types of competencies are relevant to medical education. Indeed, only one  
47  
48 study has examined leadership in this context. Violato and Cawthorpe<sup>16</sup> in a systematic  
49  
50 review identified key competencies for scholars, teachers, researchers, and leaders in medical  
51  
52 education. These include (1) medical education expert, (2) educational leadership, (3)  
53  
54 curriculum designer, (4) teacher, (5) educational researcher and scholar, and (6) learner  
55  
56  
57  
58  
59  
60



1  
2  
3 assessor. They concluded that acquisition of these competencies requires systematic formal  
4  
5 education such as graduate studies.  
6

7 Leadership is a complex, multifaceted phenomena that is widely observed but poorly  
8  
9 understood. In consonance with the conclusions of others<sup>1,10</sup> the foregoing review indicates  
10  
11 that further empirical work in leadership – particularly in medical education – is required.  
12  
13 Given that leadership is associated with student achievement, successful team functioning,  
14  
15 and efficient institutional operations, it is critical that an empirically supported,  
16  
17 comprehensive definition be developed in medical education. The major purpose of the  
18  
19 present study, therefore, was to identify the core competencies for medical education leaders.  
20  
21 Accordingly, we adapted a survey questionnaire based on the instrument from Wagner et al.<sup>17</sup>  
22  
23 to present to medical education leaders to identify the primary competencies of medical  
24  
25 education leadership. Specifically, we wished to address the following research questions: 1)  
26  
27 what are the perceived competencies that characterize successful leadership in medical  
28  
29 education? 2) Do these perceived leadership competencies in medical education vary by  
30  
31 country or language groups or for men and women? 3) Do these desired leadership  
32  
33 competencies in medical education differ between physicians and other health professions?  
34  
35  
36  
37

## 38 **Methods**

### 39 Participants

#### 40 *Experts*

41  
42 A focus group consisting of 5 medical education experts from three countries  
43  
44 (Austria n=1; Germany n=2; Switzerland n=2) was conducted (Master of medical education  
45  
46 graduates who earned their Masters degree at University of Bern in collaboration with  
47  
48 University of Illinois at Chicago). Their specialization background was medicine (n=2) or  
49  
50 health professions (n=3). The mean age of the focus group participants was 43.2 years. They  
51  
52 had several years of clinical (M = 10.7 years) and teaching experience (M = 10.3 years), with  
53  
54 a few years of medical education leadership (M = 2.4 years).  
55  
56  
57  
58  
59  
60

### *Survey Respondents*

A final sample of 229 participants from six countries completed an electronic survey (338 had been contacted for a 67.8% response rate). Most participants were from Canada (n = 75; 32.8%), followed by the USA (n = 59; 25.8%), Switzerland (n = 41; 17.9%), Germany (n = 25; 10.9%), Austria (n = 14; 6.6%), and the UK (n=14; 6.1%). The participants all held academic positions in medical education with different backgrounds including physicians (n = 91; 39.7%), nurses (n = 84; 36.7%), educators (n = 25; 10.9%), and other health professionals (n = 29; 12.7%).

There were 135 (59.0%) women and 94 (41.0%) men. The mean age for women was 50.3 years and for men was 51.0 years. There were 137 (59.8%; women = 90; men = 47) from countries with English as the predominant language, 88 (38.4%; women = 45; men = 43) from countries with German as the predominant language, and 4 from countries with various other identified predominant languages (2.2%; Netherlands = 2; Denmark = 1; South Africa = 1). Respondents indicated the following academic titles: Professor = 123 (53.7%); Associate Professor = 37 (16.2%); Assistant Professor = 28 (12.2%); Master degree teacher = 36 (15.7%); and Bachelor degree teacher = 5 (2.2%).

Compared to the 109 participants (32.2%) that did not complete the survey, those that had completed the survey had slightly more years of experience in leadership (M = 11.97(.58) versus M = 8.54 (8.39),  $p < .05$ ), years of teaching experience (M = 17.34(10.81) versus M = 14.26 (10.43),  $p < .05$ ) as they did years of clinical experience (M = 17.75 (12.22) versus M = 15.23(12.26),  $p < .05$ ). There were no differences between the two groups, however, for sex composition, language group, and level of scholar.

### *Focus Group Procedures*

Five experts in a focus group were asked to select the most appropriate competencies relevant for medical education from the Leadership Competency Model questionnaire developed by Wagner et al.<sup>17</sup>. To determine which competencies to retain from the 107 items

1  
2  
3 dealing with leadership in general, a consensus approach was used. At least four expert raters  
4  
5 (80%) were required to independently agree that the competency was applicable to leadership  
6  
7 in medical education for the competency to be retained. Based on this procedure the  
8  
9 questionnaire was reduced to 63 items applicable to leadership in medical education.  
10

### 11 *Survey Procedures*

12  
13  
14 Survey participants were from four medical schools in each country, which was  
15  
16 randomly selected using the cluster sampling method (Austria, Canada, Germany,  
17  
18 Switzerland, United Kingdom, and the USA). In cluster sampling, according to Gay et al.<sup>18</sup>  
19  
20 intact groups rather than individuals are randomly selected. Cluster sampling was the only  
21  
22 feasible method of selecting a sample because it was not possible to obtain a list of all  
23  
24 members from the theoretical population. Gay et al.<sup>18</sup> suggest using this method when the  
25  
26 population is very large and spread over a wide geographical area such as the present sample<sup>±</sup>.  
27  
28 The 63-item survey was sent by email to professors, associate professors and assistant  
29  
30 professors.  
31  
32

### 33 *Data Analyses*

34  
35  
36 Reliability of the survey scores was assessed using Cronbach's alpha. In addition to  
37  
38 content validity, evidence of factorial validity was assessed using exploratory factor analysis.  
39  
40 Specifically, principal components analysis with varimax rotation was utilized. Between  
41  
42 group differences were analyzed using contingency tables (Fisher's Exact Test) and  
43  
44 multivariate analyses of variance (MANOVAs). The study was approved by the Ethics  
45  
46 Review Committee of the University Ambrosiana.  
47  
48  
49  
50  
51  
52  
53  
54  
55

---

56  
57  
58 <sup>±</sup> Switzerland has only five medical schools and Austria has four. Switzerland has only four universities that  
59 offer academic nursing or health professions education. Austria has also only four such institutions.  
60

## Results

### Descriptive Statistics of the Survey Items

Descriptive statistics of the items are summarized in Table 1. Most of the participants rated each item as important (4) or very important (5), but for many items the entire scale (1 – 5) was utilized (Table 1). The means of the items ranged from 3.85 (#18: Honesty and Integrity) to 4.76 (#3: Personnel Decision Quality). The standard deviations are typical (< 1.0) for 5-point items, indicating that data points are clustered closely around the mean.

### Principal Component Analyses and Reliability

Several exploratory principal component analyses were conducted resulting in 10, 8, 7 and 5 factor solutions. It was determined that the optimum solution was five factors as they accounted for more than 50% of the variance, were cohesive, and made theoretical sense (see Table 2). The five factors identified as leadership competencies were Social Responsibility, Innovation, Self Management, Task Management, and Justice Orientation.

Of the initial 63 items, eleven were removed since they had small loadings (< 0.40) on all factors. The removed questions were from the following competency domains: one from Task Management; one from Social Responsibility; one from Self Management Competencies; six from Leading Others; and one from Innovation.

As can be seen from Table 2, the eigenvalue for Factor 1 (Social Responsibility) is large (35.55) compared to the others. This shows that the Social Responsibility factor across countries, languages, sex, professions and experiences in medical education was the most cohesive, accounting for the most variance (16.63%). Innovation was identified as the second factor, accounting for 15.35% of the total variance. Self Management, Task Management, and Justice Orientation were also identified as shown in Table 2.

### **Insert Table 1 Here**

The results summarized in Table 2 also show very high reliability of items within each factor. Cronbach`s alpha was 0.93 for Social Responsibility and Innovation,

1  
2  
3 respectively, 0.84 for Self Management, 0.72 for Task Management, and 0.93 for Factor 5  
4  
5 Justice Orientation. All five factors were intercorrelated (mean  $r = 0.55$ ; range: 0.44 – 0.79;  
6  
7  $p < .01$ )  
8

9  
10 Together with the high internal consistency each factor's items, the overall pattern of  
11  
12 factor loadings supports the coherence of the factors. Among the items that had the highest  
13  
14 loadings on Social Responsibility, for example, are honesty and integrity (.81) and  
15  
16 accountability (.81). All the other loadings on this factor were moderate (e.g.,  $>.40$ ) to large  
17  
18 ( $>.80$ ). A similar pattern of loadings is evident for the other four factors.  
19

20  
21 A close inspection of Table 2 also shows that there is agreement between the items  
22  
23 that form the scales of the original instrument<sup>16</sup> and the obtained factor structure. Many of the  
24  
25 items do load on the expected factors (or scales) even though our results produced a slightly  
26  
27 different set of scales (i.e., Justice Orientation) compared to the original Wagner et al.  
28  
29 instrument<sup>16</sup>. The sum of scores was calculated for items with the highest loadings under  
30  
31 each factor. These new scores were used as dependent variables in the subsequent analyses.  
32  
33

### 34 **Insert Table 2 Here**

#### 35 Differences between Countries and Sex Differences

36  
37  
38 Given the disproportionate number of women (60.9%) in the sample, we compared the  
39  
40 number of men and women who spoke each language. Accordingly, a contingency table with  
41  
42 sex by language with Fisher's Exact Test was done. There was a significant difference  
43  
44 between the proportion of English speaking women (90; 66.7%) and German (45; 33.3%)  
45  
46 speaking ones ( $p < .01$ ), while for men there were approximately equal proportions (English =  
47  
48 51.1%; German 48.9%). Two, one-way ANOVAs (independent variable = sex) with the  
49  
50 dependent variables (age and leadership experience) were run. There were no significant  
51  
52 differences for age ( $F = 0.48$ ,  $p < 0.49$ ) or for leadership experience ( $F = 1.80$ ,  $p < 0.18$ )  
53  
54  
55  
56 between men and women.  
57

### 58 **Insert Table 3 Here**

### *Sex and Language Differences by Sub-scales*

A two-way MANOVA (independent variables = sex and language) with 5 dependent variables (factors = Social Responsibility, Innovation, Self Management, Task Management and Justice Orientation) was run. There was no main effect for sex (Wilk's lambda = 0.96,  $p < 0.10$ ). There was a main effect for language (Wilk's lambda = 0.93,  $p < 0.007$ ), but on only two factors (Innovation, Justice Orientation) with English speakers providing higher ratings than German speakers on both factors (Table 3). There were no significant interaction effects (Wilk's lambda = 0.98,  $p < 0.50$ ). The means and standard deviations of the factors by sex and language are shown in Table 3.

### Differences between Physicians and Other Health Professionals

A one-way MANOVA (independent variable = physicians and other health professionals) with 5 dependent variables (factors = Social Responsibility, Innovation, Self Management, Task Management and Justice Orientation) was conducted. There were significant differences between physicians and other health professionals (Wilk's lambda = 0.93,  $p < 0.01$ ). As shown in Table 4, Social Responsibility, Innovation, and Justice Orientation were rated higher by other health professionals than by physicians. To identify which groups of health professionals (nurse, general practitioner, internist, surgeon, and educator)<sup>±</sup> endorse higher ratings on the three leadership competences, a one-way MANOVA was used. There were significant differences across specialties (Wilk's lambda = 0.82,  $p < 0.003$ ). Post hoc tests (Tukey's HSD) revealed that Social Responsibility was rated the highest by nurses ( $M = 71.79$ ), followed by internists ( $M = 70.83$ ). General practitioners rated this leadership competency the lowest ( $M = 66.53$ ). Innovation was rated

---

<sup>±</sup> A total of 53 specialities in medical and health professions were identified. To permit analyses across specialities they were coded into five groups: (1) nursing, which included nursing, midwifery, physiotherapy, and occupational therapy; (2) general practitioner comprising general practitioners, dentists, family medicine etc. (3) internal medicine comprising internists, gynaecologists, palliative specialists, oncologists, cardiologists, endocrinologists etc. (4) surgery comprising sub-specialities in surgery and anaesthesiologists, and (5) educators comprising psychologists, sociologists, biologists, chemistry educators, administrators etc.

1  
2  
3 the highest by nurses ( $M = 82.23$ ) and the lowest by general practitioners ( $M = 74.26$ ).  
4  
5 Justice Orientation was rated the highest by nurses ( $M = 21.64$ ) and the lowest by general  
6  
7 practitioners ( $M = 20.20$ ). There were no significant differences for Self Management and  
8  
9 Task Management.  
10

#### 11 **Insert Table 4 Here**

#### 12 *Group Differences between Junior, Midlevel, Senior and Administrator Scholars*

13  
14  
15  
16 A one-way MANOVA determined whether there were any significant differences in  
17  
18 the five leadership competencies across junior, midlevel, senior and administrator level  
19  
20 positions. No significant differences were found (Wilk's lambda = 0.90,  $p > 0.05$ ).  
21  
22  
23  
24

#### 25 **Discussion**

26  
27 The purpose of the present study was to identify and empirically investigate the  
28  
29 perceived competencies of leadership in medical education. First, a group of medical  
30  
31 education leaders selected 63 of the most important leadership characteristics from a list of  
32  
33 107 identified in previous research. Second, questionnaire data were used in principal  
34  
35 component analyses to obtain five competencies of leadership that include Social  
36  
37 Responsibility, Innovation, Self Management, Task Management, and Justice Orientation.  
38  
39 Cronbach's alpha reliabilities of the factors were high, indicating good coherence and internal  
40  
41 consistency. Third, differences between men and women, areas of specialization, and  
42  
43 language were found for Social Responsibility, Innovation and Justice Orientation. Fourth, all  
44  
45 five factors were strongly intercorrelated indicating that they all assessing the construct of  
46  
47 leadership. These combined results suggest that the five leadership competences represent a  
48  
49 coherent, reliable, and parsimonious model of leadership in medical education. Moreover,  
50  
51 these fit well with the definition provided by Vroom and Jago<sup>5</sup> of leadership as a process of  
52  
53 motivating people to "accomplish great things" in medical education by demonstrating social  
54  
55  
56  
57  
58  
59  
60



1  
2  
3 responsibility, innovation and justice, as well as more prosaic activities of self and task  
4  
5 management.  
6

7  
8 Medical education leaders identified Social Responsibility as the most dominant  
9  
10 competency. It was found to be the least important, in contrast, by Wagner et al.<sup>17</sup>. This  
11  
12 difference is likely due to the emphasis on collaboration and inter-disciplinary practice within  
13  
14 the medical and health professions, in comparison to competition and independence within  
15  
16 business<sup>1</sup>. Another major difference between the two models is that we identified a Justice  
17  
18 Orientation competency, which was not part of the Wagner et al.<sup>17</sup> model. It is not surprising  
19  
20 that maintaining safety, following laws and regulations, and monitoring progress, as indicated  
21  
22 by Justice Orientation, are critical to teaching in medicine. Innovation was also deemed to be  
23  
24 a major leadership competency in the present study, according to ratings of knowing learning  
25  
26 principles and building relationships. With limited resources and high expectations,  
27  
28 leadership requires creative approaches that are based on sound principles and human  
29  
30 resources. Self Management involves setting and achieving goals despite barriers; and Task  
31  
32 Management entails planning and efficiency. All of these qualities are important for managing  
33  
34 threats to human health and providing leadership to health professionals.  
35  
36  
37

38  
39 The expert input from the focus group together with the principal component analyses  
40  
41 confirmed that medical educators do have a shared vision of the competencies that comprise  
42  
43 effective leadership in medical education. These competencies, in addition, are cohesive,  
44  
45 theoretically meaningful and reliable. There were no sex differences on any of the factors.  
46  
47 Moreover, while there was generally agreement in the two language groups on three factors,  
48  
49 as indicated by the similarity in scores between languages, there were differences for  
50  
51 Innovation and Justice Orientation. It was the English language respondents who rated these  
52  
53 two factors higher than did the German language respondents. This probably reflects the  
54  
55 emphasis put on innovation and justice in educational and health systems in the Anglo world.  
56  
57  
58  
59  
60



1  
2  
3 Additionally, there were significant differences between physicians and other health  
4 professionals on some of the dimensions (Social Responsibility, Innovation, and Justice  
5 Orientation). The physicians gave lower ratings to the importance of these competencies  
6 compared to the other health professionals. The majority of responders from other health  
7 professions were nurses, followed by physiotherapists, midwives, and educators. This group  
8 is likely to spend considerable time with patients developing rapport and perhaps a sense of  
9 responsibility for creative solutions to ensure that their personal needs are met. Nurses, thus,  
10 may be likely to endorse the need for social responsibility and innovation in medical  
11 education. The Justice Orientation competency was also rated higher by other health  
12 professionals than by physicians. Knowing and applying principles of fairness to ensure that  
13 subordinates are treated fairly, may resonate more with nurses and other health care  
14 professionals than with physicians, who tend to be in a position of power over other health  
15 care professionals.

### 31 Limitations

32  
33  
34 The survey response rate was high (67.8%) but the completers were slightly older and  
35 had slightly more years of teaching and clinical experience than did the non-completers. In  
36 several other ways the two groups were the same so it is unlikely that these minor differences  
37 produced biased results. All of the six countries represent Western cultures, and, therefore,  
38 are not fundamentally different regarding social, economic and demographic characteristics.

### 44 Conclusions

45  
46  
47 The present study indicates that core competencies in medical education leadership can  
48 be empirically identified and categorized into five factors: (1) Social Responsibility, (2)  
49 Innovation, (3) Self Management, (4) Task Management, and (5) Justice Orientation that are  
50 theoretical meaningful, coherent, internal consistent and parsimonious in explaining the  
51 variance of the data. Although there are some between-group differences in the factors  
52 (physicians versus other health care professionals), there are no substantive differences by  
53  
54  
55  
56  
57  
58  
59  
60

1  
2  
3 country or language. Accordingly, the competencies appear to be stable and coherent.  
4  
5 Notwithstanding the limitations of the present study, it is one of the few that has explicitly  
6  
7 defined and provided empirical evidence for leadership competencies considered to be the  
8  
9 most important in medical education.  
10

11 Future research should be designed to replicate, extend and confirm the present  
12  
13 findings. Our 5-factor leadership competency model needs to be replicated and extended with  
14  
15 larger representative samples from other cultures. Future research could be theoretically  
16  
17 strengthened by employing confirmatory factor analyses on a new dataset. Meanwhile, we  
18  
19 have provided an empirical model of leadership competencies that can be employed to further  
20  
21 investigate leadership in medical and health professions education.  
22  
23  
24  
25  
26  
27  
28  
29  
30  
31  
32  
33  
34  
35  
36  
37  
38  
39  
40  
41  
42  
43  
44  
45  
46  
47  
48  
49  
50  
51  
52  
53  
54  
55  
56  
57  
58  
59  
60

1  
2  
3  
4 **Data sharing statement:** Raw data for this study can be acquired upon request from the  
5  
6 corresponding author at [violato@ucalgary.ca](mailto:violato@ucalgary.ca)  
7

8 **Funding:** This research received no specific grant from any funding agency in the public,  
9  
10 commercial or not-for-profit sectors  
11

12 **Competing interests:** The authors declare that they have no competing interests.  
13

14 **Authorship:** All authors have made contributions to the paper according to the ICMJE  
15  
16 guidelines for authorship: 1) substantial contributions to conception and design, acquisition of  
17  
18 data, or analysis and interpretation of data; 2) drafting the article or revising it critically for  
19  
20 important intellectual content; and 3) final approval of the version to be published.  
21  
22  
23  
24  
25  
26  
27  
28  
29  
30  
31  
32  
33  
34  
35  
36  
37  
38  
39  
40  
41  
42  
43  
44  
45  
46  
47  
48  
49  
50  
51  
52  
53  
54  
55  
56  
57  
58  
59  
60

## References

1. Bennis W. The challenge of leadership in the modern world: Introduction to special issue. *American Psych*, 2007; 62, 2-5.
2. Lipman-Blumen J. *The allure of toxic leaders: Why we follow destructive bosses and corrupt politicians – and how we can survive them*. New York: Oxford University Press, 2006.
3. Bisbee, D.C. Looking for leaders: Current practices in leadership identification in higher education. *Planning and Changing*, 2007; 38: 77–88
4. Zaccaro SJ. Traits based perspectives of leadership. *American Psych*, 2007; 62: 6-16
5. Vroom VH, Jago AG. The role of the situation in leadership. *American Psych*, 2007; 62: 17–24
6. Taylor C A, Taylor JC, Stoller J K. (2008). Exploring leadership competencies in established and aspiring physician leaders: An interview-based study. *J Gen Intern Med*, 2008; 23: 748–754
7. Minvielle E. Beyond quality management methods: meeting the challenges of health care reform. *Int J Qual Health Care*, 1997; 9: 189–92
8. Wharton CR. Leadership in medical education: The challenge of diversity. *J Med Educ*, 1987; 62: 86-94
9. Schwartz R, Pogge C. Physician leadership is essential to the survival of teaching hospitals. *Am J Surg*, 2000; 179: 462–468
10. Derue DS, Nahrgang JD, Wellman N, Humphrey SE. Trait and behavioral theories of leadership: An integration and meta-analytic test of their relative validity. *Personnel Psych*, 2011; 64: 7-52.
11. Bush T. *Theories of educational leadership and management*. SAGE Publications Ltd, 2003

12. Bush, T. Educational leadership and management: Theory, policy, and practice. South African J Educ, 2007; 27: 391–406.
13. Spillane JP, Halverson R, Diamond JB. Towards a theory of leadership practice: A distributed perspective. J Curric Studies, 2004; 36: 3–34.
14. Waters T, Grubb S. The leadership we need: Using research to strengthen the use of standards for administrator preparation and licensure programs. Aurora, CO: Mid-continent Research for Education and Learning, 2004
15. Kolb JA. A comparison of leadership behaviors and competencies in high – and average – performance teams. Communication Reports, 1997; 9: 173-183.
16. Violato C, Cawthorpe D. Core research competencies for scholars and researchers in medical education: An MSc and PhD program. Research in Medical Education - Chances and Challenges, 2009; 20: 22, Düsseldorf: German Medical Science GMS Publishing House
17. Wagner S, Bapat A, Bennett M, Burns G, Bush C, Gobeski K, Langford S, Monnot M, Pfeiffelmann B, Brian S, Stehura A. A leadership competency model. Central Michigan University. Available under: [http://www.chsbs.cmich.edu/leader\\_model/](http://www.chsbs.cmich.edu/leader_model/)  
Retrieved April 15, 2011.
18. Gay LR, Mills GE, Airasian P. Educational research: Competencies for analysis and application (9th Edition). Pearson Prentice Hall: Toronto, 2008

**Table 1: Minimum, Maximum, Mean and Standard Deviation of the 63 Questionnaire**

| Items                                 | Min | Max | Mean | SD   |
|---------------------------------------|-----|-----|------|------|
| 1. Maintain Quality                   | 1   | 5   | 4.16 | 0.77 |
| 2. Succession Planning/Recruiting     | 1   | 5   | 4.31 | 0.82 |
| 3. Personnel Decision Quality         | 1   | 5   | 4.54 | 0.69 |
| 4. Maintaining Safety                 | 1   | 5   | 4.13 | 0.87 |
| 5. Enhancing Task Knowledge           | 2   | 5   | 4.24 | 0.70 |
| 6. Eliminating Barriers to Performa.  | 1   | 5   | 4.26 | 0.72 |
| 7. Strategic Task Management          | 1   | 5   | 4.43 | 0.70 |
| 8. Communication with Community       | 1   | 5   | 3.85 | 0.90 |
| 9. Providing a Good Example           | 2   | 5   | 4.58 | 0.67 |
| 10. Knowledge of Organization Justice | 2   | 5   | 4.44 | 0.72 |
| 11. Legal Regulations                 | 1   | 5   | 4.29 | 0.75 |
| 12. Open-Door Policy                  | 2   | 5   | 4.41 | 0.78 |
| 13. Explaining Decisions respect.     | 1   | 5   | 4.55 | 0.66 |
| 14. Servant Leadership                | 1   | 5   | 4.30 | 0.77 |
| 15. Distributing Rewards Fairly       | 1   | 5   | 4.28 | 0.85 |
| 16. Responsibility for Others         | 1   | 5   | 4.24 | 0.81 |
| 17. Financial Ethics                  | 1   | 5   | 4.17 | 0.93 |
| 18. Honesty and Integrity             | 1   | 5   | 4.76 | 0.59 |
| 19. Being Accountable                 | 1   | 5   | 4.71 | 0.61 |
| 20. Time Management                   | 1   | 5   | 4.24 | 0.71 |
| 21. Goal Orientation                  | 2   | 5   | 4.21 | 0.66 |
| 22. Taking Initiatives                | 1   | 5   | 4.13 | 0.74 |
| 23. Effort: achieve goals             | 1   | 5   | 4.26 | 0.73 |
| 24. Persistence: despite challenges   | 2   | 5   | 4.32 | 0.71 |
| 25. Self Control                      | 1   | 5   | 4.17 | 0.80 |
| 26. Stress Tolerance                  | 2   | 5   | 4.36 | 0.67 |
| 27. Adaptability                      | 1   | 5   | 4.45 | 0.73 |
| 28. Self Reliance                     | 1   | 5   | 4.21 | 0.79 |
| 29. Continuous Learning               | 1   | 5   | 4.36 | 0.71 |
| 30. Seeking Feedback                  | 1   | 5   | 4.35 | 0.72 |
| 31. Communicating with Co-workers     | 2   | 5   | 4.51 | 0.67 |
| 32. Active Listening                  | 1   | 5   | 4.50 | 0.71 |
| 33. Facilitating Discussion           | 1   | 5   | 4.37 | 0.71 |
| 34. Developing External Contacts      | 1   | 5   | 4.11 | 0.80 |
| 35. Psychological Knowledge           | 2   | 5   | 4.02 | 0.79 |
| 36. Social Perceptiveness             | 2   | 5   | 4.10 | 0.75 |
| 37. Nurturing Relationships           | 2   | 5   | 4.32 | 0.69 |
| 38. Taking Charge                     | 2   | 5   | 4.20 | 0.73 |
| 39. Orienting Others                  | 1   | 5   | 4.10 | 0.80 |
| 40. Setting Goals for Others          | 2   | 5   | 4.00 | 0.77 |
| 41. Reinforcing Success               | 3   | 5   | 4.18 | 0.68 |
| 42. Developing and Building Teams     | 2   | 5   | 4.32 | 0.69 |
| 43. Knowing Principles of Learning    | 2   | 5   | 3.94 | 0.83 |
| 44. Assessing Others                  | 2   | 5   | 4.07 | 0.71 |

|                                     |   |   |      |      |
|-------------------------------------|---|---|------|------|
| 45. Coaching, Develop, Instructing  | 1 | 5 | 4.23 | 0.76 |
| 46. Cooperating                     | 1 | 5 | 4.36 | 0.66 |
| 47. Resolving Conflicts/Negotiating | 2 | 5 | 4.44 | 0.62 |
| 48. Empowerment                     | 2 | 5 | 4.38 | 0.71 |
| 49. Political Savvy                 | 1 | 5 | 4.10 | 0.88 |
| 50. Critical Thinking               | 2 | 5 | 4.41 | 0.68 |
| 51. Creative Problem Solving        | 1 | 5 | 4.44 | 0.72 |
| 52. Identifying Problems            | 3 | 5 | 4.44 | 0.64 |
| 53. Seeking Improvement             | 2 | 5 | 4.17 | 0.76 |
| 54. Openness to Ideas               | 1 | 5 | 4.46 | 0.70 |
| 55. Collaborating                   | 1 | 5 | 4.36 | 0.74 |
| 56. Perceiving Systems              | 2 | 5 | 4.15 | 0.76 |
| 57. Evaluating Consequences         | 2 | 5 | 4.21 | 0.76 |
| 58. Visioning                       | 2 | 5 | 4.02 | 0.88 |
| 59. Managing the Future             | 2 | 5 | 4.20 | 0.75 |
| 60. Sensitivity to Situations       | 2 | 5 | 4.16 | 0.75 |
| 61. Challenging the Status Quo      | 1 | 5 | 4.24 | 0.82 |
| 62. Intelligent Risk-Taking         | 2 | 5 | 4.21 | 0.75 |
| 63. Reinforcing Change              | 2 | 5 | 4.29 | 0.69 |

**Table 2: Principal Components Orthogonally Rotated Varimax Factor Matrix to the Normalized Kaiser Criterion\***

| Items                                   | Factors                       |                 |                         |                         |                             |
|-----------------------------------------|-------------------------------|-----------------|-------------------------|-------------------------|-----------------------------|
|                                         | 1<br>Social<br>Responsibility | 2<br>Innovation | 3<br>Self<br>Management | 4<br>Task<br>Management | 5<br>Justice<br>Orientation |
| Succession<br>Planning<br>/Recruiting   |                               |                 |                         | .636 TM                 |                             |
| Personnel<br>Decision Quality           |                               |                 |                         | .578 TM                 |                             |
| Maintaining<br>Safety                   |                               |                 |                         |                         | .480 TM                     |
| Enhancing Task<br>Knowledge             |                               |                 |                         | .401 TM                 |                             |
| Eliminating<br>Barriers                 |                               |                 |                         | .457 TM                 |                             |
| Strategic Task<br>Management            |                               |                 |                         | .540 TM                 |                             |
| Communication<br>with Community         |                               |                 |                         |                         |                             |
| Providing a Good<br>Example             | .511 SR                       |                 |                         |                         |                             |
| Knowledge of<br>Organization<br>Justice |                               |                 |                         |                         | .546 SR                     |
| Legal<br>Regulations                    |                               |                 |                         |                         | .674 SR                     |
| Open-Door<br>Policy                     | .677SR                        |                 |                         |                         |                             |
| Explaining<br>Decisions respect         | .698SR                        |                 |                         |                         |                             |
| Servant<br>Leadership                   | .563 SR                       |                 |                         |                         |                             |
| Distributing<br>Rewards Fairly          | .434 SR                       |                 |                         |                         |                             |
| Responsibility for<br>Others            |                               |                 |                         | .486 SR                 |                             |
| Honesty and<br>Integrity                | .810 SR                       |                 |                         |                         |                             |
| Being<br>Accountable                    | .806 SR                       |                 |                         |                         |                             |
| Goal Orientation                        |                               |                 | .544 SM                 |                         |                             |
| Taking Initiatives                      |                               |                 | .515 SM                 |                         |                             |
| Effort: achieve                         |                               |                 | .576 SM                 |                         |                             |



|                                          |         |         |         |  |         |
|------------------------------------------|---------|---------|---------|--|---------|
| goals                                    |         |         |         |  |         |
| Persistence:<br>despite<br>challenges    |         |         | .516 SM |  |         |
| Self Control                             |         |         | .484 SM |  |         |
| Stress Tolerance                         |         |         | .530 SM |  |         |
| Adaptability                             | .651 SM |         |         |  |         |
| Self Reliance                            |         |         | .623 SM |  |         |
| Continuous<br>Learning                   |         |         | .431 SM |  |         |
| Seeking<br>Feedback                      | .506 SM |         |         |  |         |
| Communicating<br>with Co-workers         | .511 LO |         |         |  |         |
| Active Listening                         | .658 LO |         |         |  |         |
| Facilitating<br>Discussion               | .494 LO |         |         |  |         |
| Developing and<br>Building Teams         |         | .498LO  |         |  |         |
| Psychological<br>Knowledge               |         | .593LO  |         |  |         |
| Social<br>Perceptiveness                 |         | .649LO  |         |  |         |
| Setting Goals for<br>Others              |         |         | .568 LO |  |         |
| Knowing<br>Principles of<br>Learning     |         | .565LO  |         |  |         |
| Assessing Others                         |         | .495 LO |         |  | .567 LO |
| Coaching,<br>Development,<br>Instruction |         | .546 LO |         |  | .405 LO |
| Cooperating                              | .603 LO |         |         |  |         |
| Empowerment                              | .425 LO |         |         |  |         |
| Political Savvy                          |         | .596LO  |         |  |         |
| Critical Thinking                        |         | .521IN  |         |  |         |
| Creative Problem<br>Solving              | .473 LO | .529IN  |         |  |         |
| Identifying<br>Problems                  |         | .509IN  |         |  |         |

|                            |        |        |       |       |       |
|----------------------------|--------|--------|-------|-------|-------|
| Openness to Ideas          | .654IN |        |       |       |       |
| Collaborating              | .542IN | .418IN |       |       |       |
| Perceiving Systems         |        | .643IN |       |       |       |
| Evaluating Consequences    |        | .616IN |       |       |       |
| Visioning                  |        | .657IN |       |       |       |
| Managing the Future        |        | .720IN |       |       |       |
| Sensitivity to Situations  |        | .664IN |       |       |       |
| Challenging the Status Quo | .437IN | .499IN |       |       |       |
| Intelligent Risk-Taking    |        | .642IN |       |       |       |
| Reinforcing Change         |        | .537IN |       |       |       |
|                            |        |        |       |       |       |
| Eigenvalue                 | 35.55  | 5.68   | 3.66  | 3.48  | 3.12  |
| % of Variance              | 16.63  | 15.35  | 7.09  | 6.92  | 5.19  |
| M                          | 69.52  | 79.00  | 37.71 | 25.82 | 20.95 |
| SD                         | 8.22   | 10.15  | 4.56  | 3.06  | 2.73  |
| Cronbach`s alpha           | 0.93   | 0.93   | 0.84  | 0.72  | 0.93  |

\*Extraction Method: Principal Component Analysis. Rotation Method: Varimax with Kaiser Normalization; Rotation converged in 12 iterations; SR = Social Responsibility; LO = Leading Others; SM = Self Management; I = Innovation; TM = Task Management.

**Table 3: Means and Standard Deviations for the Five Subscales for Sex and Language**

|                              | Sex    | Language | M     | SD    | n   |
|------------------------------|--------|----------|-------|-------|-----|
| <b>Social Responsibility</b> | Male   | English  | 67.40 | 11.05 | 47  |
|                              |        | German   | 68.60 | 7.72  | 45  |
|                              |        | Total    | 67.99 | 9.54  | 92  |
|                              | Female | English  | 71.31 | 7.35  | 90  |
|                              |        | German   | 68.63 | 6.32  | 43  |
|                              |        | Total    | 70.44 | 7.12  | 133 |
|                              | Total  | English  | 69.97 | 8.95  | 137 |
|                              |        | German   | 68.61 | 7.03  | 88  |
|                              |        | Total    | 69.44 | 8.26  | 225 |
| <b>Innovation*</b>           | Male   | English  | 77.68 | 11.94 | 47  |
|                              |        | German   | 77.38 | 10.95 | 45  |
|                              |        | Total    | 77.53 | 11.41 | 92  |
|                              | Female | English  | 80.99 | 9.00  | 90  |
|                              |        | German   | 77.33 | 8.54  | 43  |
|                              |        | Total    | 79.80 | 8.99  | 133 |
|                              | Total  | English  | 79.85 | 10.18 | 137 |
|                              |        | German   | 77.35 | 9.79  | 88  |
|                              |        | Total    | 78.88 | 10.09 | 225 |
| <b>Self Management</b>       | Male   | English  | 37.57 | 5.06  | 47  |
|                              |        | German   | 37.56 | 4.93  | 45  |
|                              |        | Total    | 37.57 | 4.97  | 92  |
|                              | Female | English  | 38.32 | 4.23  | 90  |
|                              |        | German   | 36.60 | 4.28  | 43  |
|                              |        | Total    | 37.77 | 4.31  | 133 |
|                              | Total  | English  | 38.07 | 4.53  | 137 |
|                              |        | German   | 37.09 | 4.62  | 88  |
|                              |        | Total    | 37.68 | 4.58  | 225 |
| <b>Task Management</b>       | Male   | English  | 25.68 | 3.25  | 47  |
|                              |        | German   | 25.69 | 2.75  | 45  |
|                              |        | Total    | 25.68 | 3.00  | 92  |
|                              | Female | English  | 25.84 | 3.31  | 90  |
|                              |        | German   | 25.77 | 2.67  | 43  |
|                              |        | Total    | 25.82 | 3.11  | 133 |
|                              | Total  | English  | 25.79 | 3.28  | 137 |
|                              |        | German   | 25.73 | 2.69  | 88  |
|                              |        | Total    | 25.76 | 3.06  | 225 |
| <b>Justice Orientation*</b>  | Male   | English  | 20.74 | 3.17  | 47  |
|                              |        | German   | 19.98 | 2.84  | 45  |
|                              |        | Total    | 20.37 | 3.02  | 92  |
|                              | Female | English  | 21.96 | 2.30  | 90  |
|                              |        | German   | 20.19 | 2.35  | 43  |
|                              |        | Total    | 21.38 | 2.45  | 133 |
|                              | Total  | English  | 21.54 | 2.68  | 137 |
|                              |        | German   | 20.08 | 2.60  | 88  |
|                              |        | Total    | 20.97 | 2.74  | 225 |

\*p &lt; .05

**Table 4: Means and Standard Deviations between Physicians and Other Health****Professionals**

|                         | Physicians versus Health Professions | M     | SD    | n   |
|-------------------------|--------------------------------------|-------|-------|-----|
| Social Responsibility** | Physicians                           | 67.12 | 9.58  | 91  |
|                         | Health Professionals                 | 71.09 | 6.76  | 138 |
|                         | Total                                | 69.51 | 8.22  | 229 |
| Innovation**            | Physicians                           | 76.20 | 10.53 | 91  |
|                         | Health Professionals                 | 80.83 | 9.32  | 138 |
|                         | Total                                | 78.99 | 10.05 | 229 |
| Self Management         | Physicians                           | 37.12 | 5.00  | 91  |
|                         | Health Professionals                 | 38.09 | 4.22  | 138 |
|                         | Total                                | 37.70 | 4.56  | 229 |
| Task Management         | Physicians                           | 25.51 | 3.06  | 91  |
|                         | Health Professionals                 | 26.00 | 3.05  | 138 |
|                         | Total                                | 25.81 | 3.05  | 229 |
| Justice Orientation*    | Physicians                           | 20.46 | 2.85  | 91  |
|                         | Health Professionals                 | 21.27 | 2.61  | 138 |
|                         | Total                                | 20.95 | 2.73  | 229 |

\*p < .05; \*\*p < .01

**STROBE 2007 (v4) checklist of items to be included in reports of observational studies in epidemiology\***  
**Checklist for cohort, case-control, and cross-sectional studies (combined)**

| Section/Topic             | Item # | Recommendation                                                                                                                                                                                                                                                                                                                                                                                                                                                         | Reported on page # |
|---------------------------|--------|------------------------------------------------------------------------------------------------------------------------------------------------------------------------------------------------------------------------------------------------------------------------------------------------------------------------------------------------------------------------------------------------------------------------------------------------------------------------|--------------------|
| Title and abstract        | 1      | (a) Indicate the study's design with a commonly used term in the title or the abstract                                                                                                                                                                                                                                                                                                                                                                                 | 1, 5               |
|                           |        | (b) Provide in the abstract an informative and balanced summary of what was done and what was found                                                                                                                                                                                                                                                                                                                                                                    | 3                  |
| <b>Introduction</b>       |        |                                                                                                                                                                                                                                                                                                                                                                                                                                                                        |                    |
| Background/rationale      | 2      | Explain the scientific background and rationale for the investigation being reported                                                                                                                                                                                                                                                                                                                                                                                   | 5-8                |
| Objectives                | 3      | State specific objectives, including any pre-specified hypotheses                                                                                                                                                                                                                                                                                                                                                                                                      | 8                  |
| <b>Methods</b>            |        |                                                                                                                                                                                                                                                                                                                                                                                                                                                                        |                    |
| Study design              | 4      | Present key elements of study design early in the paper                                                                                                                                                                                                                                                                                                                                                                                                                | 3                  |
| Setting                   | 5      | Describe the setting, locations, and relevant dates, including periods of recruitment, exposure, follow-up, and data collection                                                                                                                                                                                                                                                                                                                                        | 8-10               |
| Participants              | 6      | (a) <i>Cohort study</i> —Give the eligibility criteria, and the sources and methods of selection of participants. Describe methods of follow-up<br><i>Case-control study</i> —Give the eligibility criteria, and the sources and methods of case ascertainment and control selection. Give the rationale for the choice of cases and controls<br><i>Cross-sectional study</i> —Give the eligibility criteria, and the sources and methods of selection of participants | 8-9                |
|                           |        | (b) <i>Cohort study</i> —For matched studies, give matching criteria and number of exposed and unexposed<br><i>Case-control study</i> —For matched studies, give matching criteria and the number of controls per case                                                                                                                                                                                                                                                 |                    |
| Variables                 | 7      | Clearly define all outcomes, exposures, predictors, potential confounders, and effect modifiers. Give diagnostic criteria, if applicable                                                                                                                                                                                                                                                                                                                               | 11                 |
| Data sources/ measurement | 8*     | For each variable of interest, give sources of data and details of methods of assessment (measurement). Describe comparability of assessment methods if there is more than one group                                                                                                                                                                                                                                                                                   | 9-10               |
| Bias                      | 9      | Describe any efforts to address potential sources of bias                                                                                                                                                                                                                                                                                                                                                                                                              | 10                 |
| Study size                | 10     | Explain how the study size was arrived at                                                                                                                                                                                                                                                                                                                                                                                                                              | 9                  |
| Quantitative variables    | 11     | Explain how quantitative variables were handled in the analyses. If applicable, describe which groupings were chosen and why                                                                                                                                                                                                                                                                                                                                           | 10                 |
| Statistical methods       | 12     | (a) Describe all statistical methods, including those used to control for confounding                                                                                                                                                                                                                                                                                                                                                                                  | 10                 |
|                           |        | (b) Describe any methods used to examine subgroups and interactions                                                                                                                                                                                                                                                                                                                                                                                                    | 10                 |
|                           |        | (c) Explain how missing data were addressed                                                                                                                                                                                                                                                                                                                                                                                                                            | 10                 |
|                           |        | (d) <i>Cohort study</i> —If applicable, explain how loss to follow-up was addressed<br><i>Case-control study</i> —If applicable, explain how matching of cases and controls was addressed                                                                                                                                                                                                                                                                              |                    |

|                          |     |                                                                                                                                                                                                                                                                                                                                                                                                               |             |
|--------------------------|-----|---------------------------------------------------------------------------------------------------------------------------------------------------------------------------------------------------------------------------------------------------------------------------------------------------------------------------------------------------------------------------------------------------------------|-------------|
|                          |     | <i>Cross-sectional study</i> —If applicable, describe analytical methods taking account of sampling strategy                                                                                                                                                                                                                                                                                                  |             |
|                          |     | (e) Describe any sensitivity analyses                                                                                                                                                                                                                                                                                                                                                                         |             |
| <b>Results</b>           |     |                                                                                                                                                                                                                                                                                                                                                                                                               |             |
| Participants             | 13* | (a) Report numbers of individuals at each stage of study—eg numbers potentially eligible, examined for eligibility, confirmed eligible, included in the study, completing follow-up, and analysed<br>(b) Give reasons for non-participation at each stage<br>(c) Consider use of a flow diagram                                                                                                               | 9           |
| Descriptive data         | 14* | (a) Give characteristics of study participants (eg demographic, clinical, social) and information on exposures and potential confounders<br>(b) Indicate number of participants with missing data for each variable of interest<br>(c) <i>Cohort study</i> —Summarise follow-up time (eg, average and total amount)                                                                                           | 9, 11<br>12 |
| Outcome data             | 15* | <i>Cohort study</i> —Report numbers of outcome events or summary measures over time<br><i>Case-control study</i> —Report numbers in each exposure category, or summary measures of exposure<br><i>Cross-sectional study</i> —Report numbers of outcome events or summary measures                                                                                                                             | 12-14       |
| Main results             | 16  | (a) Give unadjusted estimates and, if applicable, confounder-adjusted estimates and their precision (eg, 95% confidence interval). Make clear which confounders were adjusted for and why they were included<br>(b) Report category boundaries when continuous variables were categorized<br>(c) If relevant, consider translating estimates of relative risk into absolute risk for a meaningful time period | 12          |
| Other analyses           | 17  | Report other analyses done—eg analyses of subgroups and interactions, and sensitivity analyses                                                                                                                                                                                                                                                                                                                | 13-14       |
| <b>Discussion</b>        |     |                                                                                                                                                                                                                                                                                                                                                                                                               |             |
| Key results              | 18  | Summarise key results with reference to study objectives                                                                                                                                                                                                                                                                                                                                                      | 14          |
| Limitations              | 19  | Discuss limitations of the study, taking into account sources of potential bias or imprecision. Discuss both direction and magnitude of any potential bias                                                                                                                                                                                                                                                    | 16          |
| Interpretation           | 20  | Give a cautious overall interpretation of results considering objectives, limitations, multiplicity of analyses, results from similar studies, and other relevant evidence                                                                                                                                                                                                                                    | 16-17       |
| Generalisability         | 21  | Discuss the generalisability (external validity) of the study results                                                                                                                                                                                                                                                                                                                                         | 17          |
| <b>Other information</b> |     |                                                                                                                                                                                                                                                                                                                                                                                                               |             |
| Funding                  | 22  | Give the source of funding and the role of the funders for the present study and, if applicable, for the original study on which the present article is based                                                                                                                                                                                                                                                 | 18          |

\*Give information separately for cases and controls in case-control studies and, if applicable, for exposed and unexposed groups in cohort and cross-sectional studies.

**Note:** An Explanation and Elaboration article discusses each checklist item and gives methodological background and published examples of transparent reporting. The STROBE checklist is best used in conjunction with this article (freely available on the Web sites of PLoS Medicine at <http://www.plosmedicine.org/>, Annals of Internal Medicine at <http://www.annals.org/>, and Epidemiology at <http://www.epidem.com/>). Information on the STROBE Initiative is available at [www.strobe-statement.org](http://www.strobe-statement.org).

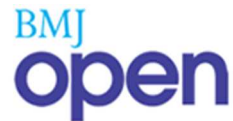

**Leadership competencies for medical education and healthcare professions: population based study**

|                                 |                                                                                                                                                                                                                                                                                                                                                                                                                                                 |
|---------------------------------|-------------------------------------------------------------------------------------------------------------------------------------------------------------------------------------------------------------------------------------------------------------------------------------------------------------------------------------------------------------------------------------------------------------------------------------------------|
| Journal:                        | <i>BMJ Open</i>                                                                                                                                                                                                                                                                                                                                                                                                                                 |
| Manuscript ID:                  | bmjopen-2012-000812.R1                                                                                                                                                                                                                                                                                                                                                                                                                          |
| Article Type:                   | Research                                                                                                                                                                                                                                                                                                                                                                                                                                        |
| Date Submitted by the Author:   | 13-Feb-2012                                                                                                                                                                                                                                                                                                                                                                                                                                     |
| Complete List of Authors:       | Citaku, Fadil; University Ambrosiana, International Graduate Medical Education<br>Violato, Claudio; University of Calgary, Medical Education and Research Unit<br>Beran, Tanya; University of Calgary, Medical Education Research Unit<br>Donnon, Tyrone; University of Calgary, Medical Education Research Unit<br>Hecker, Kent; University of Calgary, Medical Education Research Unit<br>Cawthorpe, David; University of Calgary, Psychiatry |
| <b>Primary Subject Heading</b>: | Medical education and training                                                                                                                                                                                                                                                                                                                                                                                                                  |
| Secondary Subject Heading:      | Medical management, Sociology                                                                                                                                                                                                                                                                                                                                                                                                                   |
| Keywords:                       | MEDICAL EDUCATION & TRAINING, HEALTH SERVICES ADMINISTRATION & MANAGEMENT, MEDICAL ETHICS                                                                                                                                                                                                                                                                                                                                                       |
|                                 |                                                                                                                                                                                                                                                                                                                                                                                                                                                 |

SCHOLARONE™  
Manuscripts

1  
2  
3 **Leadership competencies for medical education and healthcare professions: population**  
4  
5 **based study**  
6  
7

8 Fadil Çitaku, PhD<sup>1,2,3</sup>, Claudio Violato, PhD<sup>1,2</sup>, Tanya Beran, PhD<sup>1,2</sup>, Tyrone Donnon,  
9 PhD<sup>1,2</sup>, Kent Hecker, PhD<sup>1,2</sup> and David Cawthorpe, PhD<sup>1,2</sup>  
10  
11

12  
13  
14 <sup>1</sup>Medical Education and Research Unit  
15 Faculty of Medicine, University of Calgary  
16 Calgary, AB Canada T2N 4N1  
17

18  
19  
20 <sup>2</sup>International Graduate Medical Education  
21 University Ambrosiana  
22 Milan, Italy  
23

24 <sup>3</sup>School of Higher Education Health and Socials  
25 Südalle 22, CH-5001 Aarau, Switzerland  
26  
27

28 **Corresponding Author**  
29

30 Claudio Violato, PhD  
31 Professor, Department of Community Health Sciences  
32 Director, Medical Education and Research Unit  
33 Faculty of Medicine, University of Calgary  
34 Calgary, AB Canada T2N 4N1  
35 [violato@ucalgary.ca](mailto:violato@ucalgary.ca)  
36 phone: 403-220-7296  
37 fax: 403-210-7507  
38  
39

40 **Keywords:** leadership competencies, medical education, medical leaders, principal  
41  
42 component analyses  
43  
44

45 **Word count:** 3,601  
46  
47  
48  
49  
50  
51  
52  
53  
54  
55  
56  
57  
58  
59  
60



### Article Focus

- The major focus was to identify and empirically investigate the dimensions of leadership in medical education and healthcare professions
- A 63 item survey was developed and administered via electronic mail to 229 health care professional educators and leaders in six countries (Austria, Canada, Germany, Switzerland, the United Kingdom, and the United States of America)

### Key Messages

- Exploratory principal component analyses yielded 5 dimensions of leadership: (1) Social Responsibility, (2) Innovation, (3) Self Management, (4) Task Management, and (5) Justice Orientation
- Social Responsibility was rated higher by other health professionals compared to physicians, as was Innovation, and Justice Orientation

### Strengths and Limitations

- The results of the principal component analyses support the theoretical meaningfulness of these factors, their coherence, internal consistency and parsimony in explaining the variance of the data
- Our 5-factor leadership competency model needs to be replicated and extended with larger representative samples from other cultures
- Notwithstanding the limitations of the present study, it is one of the few that has explicitly defined and provided empirical evidence for leadership competencies considered to be the most important in medical education.

**ABSTRACT**

**Objective:** To identify and empirically investigate the dimensions of leadership in medical education and healthcare professions.

**Design:** A population based design with a focus group and a survey were used to identify the perceived competencies for effective leadership in medical education.

**Setting:** The focus group, consisting of 5 experts from three countries (Austria n=1; Germany n=2; Switzerland n=2), was conducted (all masters of medical education) and the survey was sent to health professionals from medical schools and teaching hospitals in six countries (Austria, Canada, Germany, Switzerland, the United Kingdom, and the United States of America).

**Participants:** The participants were educators, physicians, nurses, and other health professionals who held academic positions in medical education. A total of 229 completed the survey; 135 (59.0%) women (age M = 50.3 years) and 94 (41.0%) men (mean age = 51.0 years).

**Measures:** A 63 item survey measuring leadership competencies was developed and administered via electronic mail to participants.

**Results:** Exploratory principal component analyses yielded 5 factors accounting for 51.2% of the variance: (1) Social Responsibility, (2) Innovation, (3) Self Management, (4) Task Management, and (5) Justice Orientation. There were significant differences between physicians and other health professionals on some factors (Wilk's lambda = 0.93,  $p < 0.01$ ). Social Responsibility was rated higher by other health professionals (M=71.09) than by physicians (M=67.12), as was Innovation (health professionals M=80.83; physicians M=76.20), and Justice Orientation (health professionals M=21.27; physicians M=20.46).

**Conclusions:** The results of the principal component analyses support the theoretical meaningfulness of these factors, their coherence, internal consistency and parsimony in

1  
2  
3 explaining the variance of the data. Although there are some between-group differences, the  
4  
5 competencies appear to be stable and coherent.  
6  
7  
8  
9  
10  
11  
12  
13  
14  
15  
16  
17  
18  
19  
20  
21  
22  
23  
24  
25  
26  
27  
28  
29  
30  
31  
32  
33  
34  
35  
36  
37  
38  
39  
40  
41  
42  
43  
44  
45  
46  
47  
48  
49  
50  
51  
52  
53  
54  
55  
56  
57  
58  
59  
60

## Leadership competencies for medical education and healthcare professions: population based study

According to Bennis<sup>1</sup> – an expert in the study of leadership – an important threat facing the world today is the lack of effective leadership of our human institutions. Indeed, Lipman-Blumen<sup>2</sup> has called attention to the failure of leadership in government, universities, healthcare and financial institutions. Health organizations and medical schools – like other human institutions – need competent and effective leaders now more than ever to face the threats and challenges of the modern world<sup>3,4</sup>.

Long time scholars in the field of leadership, Vroom and Jago<sup>5</sup> defined leadership as a “process of motivating people to work together collaboratively to accomplish great things” (p. 18). Accordingly, leadership is a process, not a property of a person. It involves a particular form of influence called *motivating*, resulting in collaboration in pursuit of a common goal to achieve the great things that are in the minds of both leader and followers<sup>5</sup>. Identifying and defining the central competencies of leadership, however, remains elusive. The major purpose of the present study was to empirically investigate the core competencies for medical education leaders – an area that has not been systematically studied.

Leaders face many challenges in healthcare and medical education institutions<sup>6,7,8</sup>. Educational leaders are under scrutiny to achieve heightened expectations for improvement to teaching and learning. They are called to be educational visionaries, instructional and curriculum leaders, assessment experts, community builders, public relations experts, budget analysts, facility managers, special programs administrators, and expert overseers of legal, contractual, and policy mandates and initiatives. Yet, they encounter major challenges such as commercialization of the university's and medical school's central purpose, perceived lack of accountability of higher education, and heightened sensitivity of taxpayers toward ineffective and inefficient leadership in academia<sup>9</sup>. Medical school leaders, in addition, are confronted with many concerns such as financial stability, curriculum development, research

1  
2  
3 support, and accreditation standards. The ability to meet these demands may be compromised  
4  
5 as a result of inadequate and inefficient leadership.  
6

### 7 Leadership Theories

8  
9 In a recent (2011) meta-analysis of trait and behavioral theories of leadership, Derue  
10 Nahrgang, Wellman and Humphrey<sup>10</sup> concluded that much of the research evidence fails to  
11 provide an integrated framework for understanding what constitutes leadership effectiveness.  
12 They did empirically identify some leader traits and behaviors that represent effective  
13 leadership, however. The concept of leadership overlaps with two similar terms, management  
14 and administration. The former is used widely in Europe and Africa, while the latter is  
15 preferred in the United States, Canada and Australia. Leadership is often of great  
16 contemporary interest in most countries in the developed world<sup>11</sup>.  
17  
18  
19  
20  
21  
22  
23  
24  
25  
26

27 Some leadership researchers distinguish between leadership, administration and  
28 management. They suggest that leadership is synonymous with change while management  
29 and administration is considered as maintenance. All three dimensions are identified as  
30 critical functions of organizational activity. Taken together, leadership can be construed as a  
31 means of shaping the goals, motivations, and actions of others to initiate change or maintain  
32 stability<sup>12</sup>. Some researchers have adopted a social perspective to conceptualize leadership.  
33 Spillane, Halverson and Diamond<sup>13</sup>, for example, argued that leadership activity is defined or  
34 constructed through the interaction of leaders and followers during the execution of leadership  
35 tasks.  
36  
37  
38  
39  
40  
41  
42  
43  
44  
45  
46

### 47 The Importance of Effective Leadership

48  
49 Many authors<sup>14,15</sup> have argued that high-quality leadership is imperative to the success  
50 of educational institutions. Many researchers have emphasized idealized personal  
51 characteristics such as educational visionaries, instructional and curriculum leaders,  
52 assessment experts, community builders, public relations experts, budget analysts, facility  
53 managers, special programs administrators, and expert overseers of legal, contractual, and  
54  
55  
56  
57  
58  
59  
60

1  
2  
3 policy mandates and initiatives are thought to characterize effective leaders. The  
4  
5 preponderance of empirical evidence, however, does not support this trait model of leadership  
6  
7 effectiveness<sup>10</sup>. Although effective leaders can have a positive influence on achievement,  
8  
9 poor leaders can have a marginal or even negative impact on success<sup>14</sup>.  
10

11  
12 Waters and Grubb<sup>14</sup> in their study reported three major findings that support the notion  
13  
14 that school-level leadership matters in student achievement. First, they found that principal  
15  
16 leadership was correlated with student achievement; one standard deviation improvement in  
17  
18 principal leadership was associated with a 10 percentile increase in student achievement.  
19  
20 Second, they identified several leadership practices or processes required to fulfill a number  
21  
22 of responsibilities that were significantly and directly related to student achievement. Third,  
23  
24 they found a differential impact of leadership – just as leaders can have a positive impact on  
25  
26 student's achievement, they also can have marginal or, worse, a negative impact on student's  
27  
28 achievement.  
29  
30

31  
32 Wagner and colleagues operationalized leadership competencies based on a systematic  
33  
34 review of research in business practices, resulting in an inventory of over 107 specific  
35  
36 competencies<sup>16</sup>. These were categorized to obtain five major competencies including self  
37  
38 management that refers to personal insight and self-control; leading others involves  
39  
40 motivating others to set and meet goals; task management includes effective and efficient  
41  
42 completion of prioritized duties; innovation describes developing a vision and responding to  
43  
44 opportunities; and social responsibility entails promoting integrity. It is not yet known  
45  
46 whether these types of competencies are relevant to medical education. Indeed, only one  
47  
48 study has examined leadership in this context. Violato and Cawthorpe<sup>17</sup> in a systematic  
49  
50 review identified key competencies for scholars, teachers, researchers, and leaders in medical  
51  
52 education. These include (1) medical education expert, (2) educational leadership, (3)  
53  
54 curriculum designer, (4) teacher, (5) educational researcher and scholar, and (6) learner  
55  
56  
57  
58  
59  
60

1  
2  
3 assessor. They concluded that acquisition of these competencies requires systematic formal  
4  
5 education such as graduate studies.  
6

7 Leadership is a complex, multifaceted phenomena that is widely observed but poorly  
8  
9 understood. In consonance with the conclusions of others<sup>1,10</sup> the foregoing review indicates  
10  
11 that further empirical work in leadership – particularly in medical education – is required.  
12  
13 Given that leadership is associated with student achievement, successful team functioning,  
14  
15 and efficient institutional operations, it is critical that an empirically supported,  
16  
17 comprehensive definition be developed in medical education. The major purpose of the  
18  
19 present study, therefore, was to identify the core competencies for medical education leaders.  
20  
21 Accordingly, we adapted a survey questionnaire based on the instrument from Wagner et al.<sup>16</sup>  
22  
23 to present to medical education leaders to identify the primary competencies of medical  
24  
25 education leadership. Specifically, we wished to address the following research questions: 1)  
26  
27 what are the perceived competencies that characterize successful leadership in medical  
28  
29 education? 2) Do these perceived leadership competencies in medical education vary by  
30  
31 country or language groups or for men and women? 3) Do these desired leadership  
32  
33 competencies in medical education differ between physicians and other health professions?  
34  
35  
36  
37

## 38 **Methods**

### 39 Participants

#### 40 *Experts*

41  
42 A focus group consisting of 5 medical education experts from three countries  
43  
44 (Austria n=1; Germany n=2; Switzerland n=2) was conducted (Master of medical education  
45  
46 graduates who earned their Masters degree at University of Bern in collaboration with  
47  
48 University of Illinois at Chicago). Their specialization background was medicine (n=2) or  
49  
50 health professions (n=3). The mean age of the focus group participants was 43.2 years. They  
51  
52 had several years of clinical (M = 10.7 years) and teaching experience (M = 10.3 years), with  
53  
54 a few years of medical education leadership (M = 2.4 years).  
55  
56  
57  
58  
59  
60

### *Survey Respondents*

A final sample of 229 participants from six countries completed an electronic survey (338 had been contacted for a 67.8% response rate). Most participants were from Canada (n = 75; 32.8%), followed by the USA (n = 59; 25.8%), Switzerland (n = 41; 17.9%), Germany (n = 25; 10.9%), Austria (n = 14; 6.6%), and the UK (n=14; 6.1%). The participants all held academic positions in medical education with different backgrounds including physicians (n = 91; 39.7%), nurses (n = 84; 36.7%), educators (n = 25; 10.9%), and other health professionals (n = 29; 12.7%).

There were 135 (59.0%) women and 94 (41.0%) men. The mean age for women was 50.3 years and for men was 51.0 years. There were 137 (59.8%; women = 90; men = 47) from countries with English as the predominant language, 88 (38.4%; women = 45; men = 43) from countries with German as the predominant language, and 4 from countries with various other identified predominant languages (2.2%; Netherlands = 2; Denmark = 1; South Africa = 1). Respondents indicated the following academic titles: Professor = 123 (53.7%); Associate Professor = 37 (16.2%); Assistant Professor = 28 (12.2%); Master degree teacher = 36 (15.7%); and Bachelor degree teacher = 5 (2.2%).

Compared to the 109 participants (32.2%) that did not complete the survey, those that had completed the survey had slightly more years of experience in leadership (M = 11.97(.58) versus M = 8.54 (8.39),  $p < .05$ ), years of teaching experience (M = 17.34(10.81) versus M = 14.26 (10.43),  $p < .05$ ) as they did years of clinical experience (M = 17.75 (12.22) versus M = 15.23(12.26),  $p < .05$ ). There were no differences between the two groups, however, for sex composition, language group, and level of scholar.

### *Focus Group Procedures*

Five experts in a focus group were asked to select the most appropriate competencies relevant for medical education from the Leadership Competency Model questionnaire developed by Wagner et al.<sup>16</sup>. To determine which competencies to retain from the 107 items



1  
2  
3 dealing with leadership in general, a consensus approach was used. At least four expert raters  
4  
5 (80%) were required to independently agree that the competency was applicable to leadership  
6  
7 in medical education for the competency to be retained. Based on this procedure the  
8  
9 questionnaire was reduced to 63 items applicable to leadership in medical education. In the  
10  
11 present study we used the same long definitions as did Wagner et al. but because of space  
12  
13 considerations, we used brief descriptions in the tables. Appendix A contains all of the  
14  
15 Wagner et al items and an indication of which we retained in the present study and which we  
16  
17 did not use.  
18  
19

### 20 21 *Survey Procedures*

22  
23 Survey participants were from four medical schools in each country, which was  
24  
25 randomly selected using the cluster sampling method (Austria, Canada, Germany,  
26  
27 Switzerland, United Kingdom, and the USA). In cluster sampling, according to Gay et al.<sup>18</sup>  
28  
29 intact groups rather than individuals are randomly selected. Cluster sampling was the only  
30  
31 feasible method of selecting a sample because it was not possible to obtain a list of all  
32  
33 members from the theoretical population. Gay et al.<sup>18</sup> suggest using this method when the  
34  
35 population is very large and spread over a wide geographical area such as the present sample<sup>±</sup>.  
36  
37 The 63-item survey was sent by email to professors, associate professors and assistant  
38  
39 professors.  
40  
41

### 42 43 *Data Analyses*

44  
45 Reliability of the survey scores was assessed using Cronbach's alpha. In addition to  
46  
47 content validity, evidence of factorial validity was assessed using exploratory factor analysis.  
48  
49 Specifically, principal components analysis with varimax rotation was utilized. Between  
50  
51 group differences were analyzed using contingency tables (Fisher's Exact Test) and  
52  
53  
54

---

55  
56  
57 <sup>±</sup> Switzerland has only five medical schools and Austria has four. Switzerland has only four universities that  
58 offer academic nursing or health professions education. Austria has also only four such institutions.  
59  
60

1  
2  
3 multivariate analyses of variance (MANOVAs). The study was approved by the Ethics  
4  
5 Review Committee of the University Ambrosiana.  
6

## 7 8 **Results**

### 9 10 Descriptive Statistics of the Survey Items

11  
12 Descriptive statistics of the items are summarized in Table 1. Most of the participants  
13  
14 rated each item as important (4) or very important (5), but for many items the entire scale (1 –  
15  
16 5) was utilized (Table 1). The means of the items ranged from 3.85 (#18: Honesty and  
17  
18 Integrity) to 4.76 (#3: Personnel Decision Quality). The standard deviations are typical (<  
19  
20 1.0) for 5-point items, indicating that data points are clustered closely around the mean.  
21

### 22 23 Principal Component Analyses and Reliability

24  
25 Several exploratory principal component analyses were conducted resulting in 10, 8,  
26  
27 7 and 5 factor solutions. It was determined that the optimum solution was five factors as they  
28  
29 accounted for more than 50% of the variance, were cohesive, and made theoretical sense (see  
30  
31 Table 2). The five factors identified as leadership competencies were Social Responsibility,  
32  
33 Innovation, Self Management, Task Management, and Justice Orientation.  
34

35  
36 Of the initial 63 items, eleven were removed since they had small loadings (< 0.40) on  
37  
38 all factors. The removed questions were from the following competency domains: one from  
39  
40 Task Management; one from Social Responsibility; one from Self Management  
41  
42 Competencies; six from Leading Others; and one from Innovation.  
43  
44

45  
46 As can be seen from Table 2, the eigenvalue for Factor 1 (Social Responsibility) is  
47  
48 large (35.55) compared to the others. This shows that the Social Responsibility factor across  
49  
50 countries, languages, sex, professions and experiences in medical education was the most  
51  
52 cohesive, accounting for the most variance (16.63%). Innovation was identified as the second  
53  
54 factor, accounting for 15.35% of the total variance. Self Management, Task Management,  
55  
56 and Justice Orientation were also identified as shown in Table 2.  
57

58  
59 **Insert Table 1 Here**  
60

1  
2  
3 The results summarized in Table 2 also show very high reliability of items within  
4 each factor. Cronbach`s alpha was 0.93 for Social Responsibility and Innovation,  
5 respectively, 0.84 for Self Management, 0.72 for Task Management, and 0.93 for Factor 5  
6  
7 Justice Orientation. All five factors where intercorrelated (mean  $r = 0.55$ ; range: 0.44 – 0.79;  
8  
9  $p < .01$ )  
10  
11  
12

13  
14 Together with the high internal consistency each factor`s items, the overall pattern of  
15 factor loadings supports the coherence of the factors. Among the items that had the highest  
16 loadings on Social Responsibility, for example, are honesty and integrity (.81) and  
17  
18 accountability (.81). All the other loadings on this factor were moderate (e.g.,  $>.40$ ) to large  
19  
20 ( $>.80$ ). A similar pattern of loadings is evident for the other four factors.  
21  
22  
23

24  
25 A close inspection of Table 2 also shows that there is agreement between the items  
26 that form the scales of the original instrument<sup>16</sup> and the obtained factor structure. Many of the  
27  
28 items do load on the expected factors (or scales) even though our results produced a slightly  
29  
30 different set of scales (i.e., Justice Orientation) compared to the original Wagner et al.  
31  
32 instrument<sup>16</sup>. The sum of scores was calculated for items with the highest loadings under  
33  
34 each factor. These new scores were used as dependent variables in the subsequent analyses.  
35  
36  
37

### 38 **Insert Table 2 Here**

#### 39 Differences between Countries and Sex Differences

40  
41  
42 Given the disproportionate number of women (60.9%) in the sample, we compared the  
43  
44 number of men and women who spoke each language. Accordingly, a contingency table with  
45  
46 sex by language with Fisher`s Exact Test was done. There was a significant difference  
47  
48 between the proportion of English speaking women (90; 66.7%) and German (45; 33.3%)  
49  
50 speaking ones ( $p < .01$ ), while for men there were approximately equal proportions (English =  
51  
52 51.1%; German 48.9%). Two, one-way ANOVAs (independent variable = sex) with the  
53  
54 dependent variables (age and leadership experience) were run. There were no significant  
55  
56  
57  
58  
59  
60

1  
2 differences for age ( $F = 0.48, p < 0.49$ ) or for leadership experience ( $F = 1.80, p < 0.18$ )  
3  
4 between men and women.  
5  
6

### 7 **Insert Table 3 Here**

#### 8 *Sex and Language Differences by Sub-scales*

9  
10 A two-way MANOVA (independent variables = sex and language) with 5 dependent  
11 variables (factors = Social Responsibility, Innovation, Self Management, Task Management  
12 and Justice Orientation) was run. There was no main effect for sex (Wilk's lambda = 0.96,  $p$   
13 < 0.10). There was a main effect for language (Wilk's lambda = 0.93,  $p < 0.007$ ), but on only  
14 two factors (Innovation, Justice Orientation) with English speakers providing higher ratings  
15 than German speakers on both factors (Table 3). There were no significant interaction effects  
16 (Wilk's lambda = 0.98,  $p < 0.50$ ). The means and standard deviations of the factors by sex  
17 and language are shown in Table 3.  
18  
19  
20  
21  
22  
23  
24  
25  
26  
27  
28

#### 29 Differences between Physicians and Other Health Professionals

30  
31 A one-way MANOVA (independent variable = physicians and other health  
32 professionals) with 5 dependent variables (factors = Social Responsibility, Innovation, Self  
33 Management, Task Management and Justice Orientation) was conducted. There were  
34 significant differences between physicians and other health professionals (Wilk's lambda =  
35 0.93,  $p < 0.01$ ). As shown in Table 4, Social Responsibility, Innovation, and Justice  
36 Orientation were rated higher by other health professionals than by physicians.  
37  
38 To identify which groups of health professionals (nurse, general practitioner, internist,  
39 surgeon, and educator)<sup>±</sup> endorse higher ratings on the three leadership competences, a one-  
40 way MANOVA was used. There were significant differences across specialties (Wilk's  
41  
42  
43  
44  
45  
46  
47  
48  
49  
50  
51

---

52  
53  
54 <sup>±</sup> A total of 53 specialities in medical and health professions were identified. To permit analyses across  
55 specialities they were coded into five groups: (1) nursing, which included nursing, midwifery, physiotherapy,  
56 and occupational therapy; (2) general practitioner comprising general practitioners, dentists, family medicine etc.  
57 (3) internal medicine comprising internists, gynaecologists, palliative specialists, oncologists, cardiologists,  
58 endocrinologists etc. (4) surgery comprising sub-specialities in surgery and anaesthesiologists, and (5) educators  
59 comprising psychologists, sociologists, biologists, chemistry educators, administrators etc.  
60

1  
2  
3 lambda = 0.82,  $p < 0.003$ ). Post hoc tests (Tukey's HSD) revealed that Social Responsibility  
4  
5 was rated the highest by nurses ( $M = 71.79$ ), followed by internists ( $M = 70.83$ ). General  
6  
7 practitioners rated this leadership competency the lowest ( $M = 66.53$ ). Innovation was rated  
8  
9 the highest by nurses ( $M = 82.23$ ) and the lowest by general practitioners ( $M = 74.26$ ).  
10  
11 Justice Orientation was rated the highest by nurses ( $M = 21.64$ ) and the lowest by general  
12  
13 practitioners ( $M = 20.20$ ). There were no significant differences for Self Management and  
14  
15 Task Management.  
16  
17

### 18 **Insert Table 4 Here**

#### 19 *Group Differences between Junior, Midlevel, Senior and Administrator Scholars*

20  
21  
22  
23 A one-way MANOVA determined whether there were any significant differences in  
24  
25 the five leadership competencies across junior, midlevel, senior and administrator level  
26  
27 positions. No significant differences were found (Wilk's lambda = 0.90,  $p > 0.05$ ).  
28  
29  
30  
31

### 32 **Discussion**

33  
34 The purpose of the present study was to identify and empirically investigate the  
35  
36 perceived competencies of leadership in medical education. First, a group of medical  
37  
38 education leaders selected 63 of the most important leadership characteristics from a list of  
39  
40 107 identified in previous research. Second, questionnaire data were used in principal  
41  
42 component analyses to obtain five competencies of leadership that include Social  
43  
44 Responsibility, Innovation, Self Management, Task Management, and Justice Orientation.  
45  
46 Cronbach's alpha reliabilities of the factors were high, indicating good coherence and internal  
47  
48 consistency. Third, differences between men and women, areas of specialization, and  
49  
50 language were found for Social Responsibility, Innovation and Justice Orientation. Fourth, all  
51  
52 five factors were strongly intercorrelated indicating that they all assessing the construct of  
53  
54 leadership. These combined results suggest that the five leadership competences represent a  
55  
56 coherent, reliable, and parsimonious model of leadership in medical education. Moreover,  
57  
58  
59  
60

1  
2  
3 these fit well with the definition provided by Vroom and Jago<sup>5</sup> of leadership as a process of  
4 motivating people to “accomplish great things” in medical education by demonstrating social  
5 responsibility, innovation and justice, as well as more prosaic activities of self and task  
6 management.  
7  
8  
9  
10

11 Medical education leaders identified Social Responsibility as the most dominant  
12 competency. It was found to be the least important, in contrast, by Wagner et al.<sup>16</sup>. This  
13 difference is likely due to the emphasis on collaboration and inter-disciplinary practice within  
14 the medical and health professions, in comparison to competition and independence within  
15 business<sup>1</sup>. Another major difference between the two models is that we identified a Justice  
16 Orientation competency, which was not part of the Wagner et al.<sup>16</sup> model. It is not surprising  
17 that maintaining safety, following laws and regulations, and monitoring progress, as indicated  
18 by Justice Orientation, are critical to teaching in medicine. Innovation was also deemed to be  
19 a major leadership competency in the present study, according to ratings of knowing learning  
20 principles and building relationships. With limited resources and high expectations,  
21 leadership requires creative approaches that are based on sound principles and human  
22 resources. Self Management involves setting and achieving goals despite barriers; and Task  
23 Management entails planning and efficiency. All of these qualities are important for managing  
24 threats to human health and providing leadership to health professionals.  
25  
26  
27  
28  
29  
30  
31  
32  
33  
34  
35  
36  
37  
38  
39  
40  
41  
42

43 The expert input from the focus group together with the principal component analyses  
44 confirmed that medical educators do have a shared vision of the competencies that comprise  
45 effective leadership in medical education. The items of Leading Others in Wagner et al.<sup>17</sup>  
46 model are found in our results as well, but are spread across several factors. If a leader  
47 demonstrates high social responsibility, innovation, self-management, task-management and  
48 justice orientation, these competencies will support him or her to efficiently lead others.  
49  
50  
51  
52  
53  
54  
55

56 These competencies, in addition, are cohesive, theoretically meaningful and reliable.  
57  
58 There were no sex differences on any of the factors. Moreover, while there was generally  
59  
60

1  
2  
3 agreement in the two language groups on three factors, as indicated by the similarity in scores  
4  
5 between languages, there were differences for Innovation and Justice Orientation. It was the  
6  
7 English language respondents who rated these two factors higher than did the German  
8  
9 language respondents. This probably reflects the emphasis put on innovation and justice in  
10  
11 educational and health systems in the Anglo world.  
12

13  
14 Additionally, there were significant differences between physicians and other health  
15  
16 professionals on some of the dimensions (Social Responsibility, Innovation, and Justice  
17  
18 Orientation). The physicians gave lower ratings to the importance of these competencies  
19  
20 compared to the other health professionals. The majority of responders from other health  
21  
22 professions were nurses, followed by physiotherapists, midwives, and educators. This group  
23  
24 is likely to spend considerable time with patients developing rapport and perhaps a sense of  
25  
26 responsibility for creative solutions to ensure that their personal needs are met. Nurses, thus,  
27  
28 may be likely to endorse the need for social responsibility and innovation in medical  
29  
30 education. The Justice Orientation competency was also rated higher by other health  
31  
32 professionals than by physicians. Knowing and applying principles of fairness to ensure that  
33  
34 subordinates are treated fairly, may resonate more with nurses and other health care  
35  
36 professionals than with physicians, who tend to be in a position of power over other health  
37  
38 care professionals.  
39  
40  
41

#### 42 43 Limitations

44  
45 The survey response rate was high (67.8%) but the completers were slightly older and  
46  
47 had slightly more years of teaching and clinical experience than did the non-completers. In  
48  
49 several other ways the two groups were the same so it is unlikely that these minor differences  
50  
51 produced biased results. All of the six countries represent Western cultures, and, therefore,  
52  
53 are not fundamentally different regarding social, economic and demographic characteristics.  
54  
55  
56  
57  
58  
59  
60

## Conclusions

The present study indicates that core competencies in medical education leadership can be empirically identified and categorized into five factors: (1) Social Responsibility, (2) Innovation, (3) Self Management, (4) Task Management, and (5) Justice Orientation that are theoretical meaningful, coherent, internal consistent and parsimonious in explaining the variance of the data. Although there are some between-group differences in the factors (physicians versus other health care professionals), there are no substantive differences by country or language. Accordingly, the competencies appear to be stable and coherent. Work in the UK has also resulted in a classification of “clinical leadership” competencies that are in concordance with the present findings<sup>19</sup>. Notwithstanding the limitations of the present study, it is one of the few that has explicitly defined and provided empirical evidence for leadership competencies considered to be the most important in medical education.

Future research should be designed to replicate, extend and confirm the present findings. Our 5-factor leadership competency model needs to be replicated and extended with larger representative samples from other cultures. Future research could be theoretically strengthened by employing confirmatory factor analyses on a new dataset. Meanwhile, we have provided an empirical model of leadership competencies that can be employed to further investigate leadership in medical and health professions education.



1  
2  
3  
4 **Data sharing statement:** Raw data for this study can be acquired upon request from the  
5  
6 corresponding author at [violato@ucalgary.ca](mailto:violato@ucalgary.ca)  
7

8 **Funding:** This research received no specific grant from any funding agency in the public,  
9  
10 commercial or not-for-profit sectors  
11

12 **Competing interests:** The authors declare that they have no competing interests.  
13

14 **Authorship:** All authors have made contributions to the paper according to the ICMJE  
15  
16 guidelines for authorship: 1) substantial contributions to conception and design, acquisition of  
17  
18 data, or analysis and interpretation of data; 2) drafting the article or revising it critically for  
19  
20 important intellectual content; and 3) final approval of the version to be published.  
21  
22  
23  
24  
25  
26  
27  
28  
29  
30  
31  
32  
33  
34  
35  
36  
37  
38  
39  
40  
41  
42  
43  
44  
45  
46  
47  
48  
49  
50  
51  
52  
53  
54  
55  
56  
57  
58  
59  
60

## References

1. Bennis W. The challenge of leadership in the modern world: Introduction to special issue. *American Psych*, 2007; 62, 2-5.
2. Lipman-Blumen J. *The allure of toxic leaders: Why we follow destructive bosses and corrupt politicians – and how we can survive them*. New York: Oxford University Press, 2006.
3. Bisbee, D.C. Looking for leaders: Current practices in leadership identification in higher education. *Planning and Changing*, 2007; 38: 77–88
4. Zaccaro SJ. Traits based perspectives of leadership. *American Psych*, 2007; 62: 6-16
5. Vroom VH, Jago AG. The role of the situation in leadership. *American Psych*, 2007; 62: 17–24
6. Taylor C A, Taylor JC, Stoller J K. (2008). Exploring leadership competencies in established and aspiring physician leaders: An interview-based study. *J Gen Intern Med*, 2008; 23: 748–754
7. Minvielle E. Beyond quality management methods: meeting the challenges of health care reform. *Int J Qual Health Care*, 1997; 9: 189–92
8. Wharton CR. Leadership in medical education: The challenge of diversity. *J Med Educ*, 1987; 62: 86-94
9. Schwartz R, Pogge C. Physician leadership is essential to the survival of teaching hospitals. *Am J Surg*, 2000; 179: 462–468
10. Derue DS, Nahrgang JD, Wellman N, et al. Trait and behavioral theories of leadership: An integration and meta-analytic test of their relative validity. *Personnel Psych*, 2011; 64: 7-52.
11. Bush T. *Theories of educational leadership and management*. SAGE Publications Ltd, 2003

12. Bush, T. Educational leadership and management: Theory, policy, and practice. South African J Educ, 2007; 27: 391–406.
13. Spillane JP, Halverson R, Diamond JB. Towards a theory of leadership practice: A distributed perspective. J Curric Studies, 2004; 36: 3–34.
14. Waters T, Grubb S. The leadership we need: Using research to strengthen the use of standards for administrator preparation and licensure programs. Aurora, CO: Mid-continent Research for Education and Learning, 2004
15. Kolb JA. A comparison of leadership behaviors and competencies in high – and average – performance teams. Communication Reports, 1997; 9: 173-183.
16. Wagner S, Bapat A, Bennett M, et al. A leadership competency model. Central Michigan University. Available under: [http://www.chsbs.cmich.edu/leader\\_model/](http://www.chsbs.cmich.edu/leader_model/) Retrieved April 15, 2011.
17. Violato C, Cawthorpe D. Core research competencies for scholars and researchers in medical education: An MSc and PhD program. Research in Medical Education - Chances and Challenges, 2009; 20: 22, Düsseldorf: German Medical Science GMS Publishing House
18. Gay LR, Mills GE, Airasian P. Educational research: Competencies for analysis and application (9th Edition). Pearson Prentice Hall: Toronto, 2008
19. Medical Leadership Competency Framework: Enhancing Engagement in Medical Leadership (3rd Edition) 2010, NHS Institute for Innovation and Improvement, University of Warwick, Coventry UK.

**Table 1: Minimum, Maximum, Mean and Standard Deviation of the 63 Questionnaire**

| Items                                 | Min | Max | Mean | SD   |
|---------------------------------------|-----|-----|------|------|
| 1. Maintain Quality                   | 1   | 5   | 4.16 | 0.77 |
| 2. Succession Planning/Recruiting     | 1   | 5   | 4.31 | 0.82 |
| 3. Personnel Decision Quality         | 1   | 5   | 4.54 | 0.69 |
| 4. Maintaining Safety                 | 1   | 5   | 4.13 | 0.87 |
| 5. Enhancing Task Knowledge           | 2   | 5   | 4.24 | 0.70 |
| 6. Eliminating Barriers to Performa.  | 1   | 5   | 4.26 | 0.72 |
| 7. Strategic Task Management          | 1   | 5   | 4.43 | 0.70 |
| 8. Communication with Community       | 1   | 5   | 3.85 | 0.90 |
| 9. Providing a Good Example           | 2   | 5   | 4.58 | 0.67 |
| 10. Knowledge of Organization Justice | 2   | 5   | 4.44 | 0.72 |
| 11. Legal Regulations                 | 1   | 5   | 4.29 | 0.75 |
| 12. Open-Door Policy                  | 2   | 5   | 4.41 | 0.78 |
| 13. Explaining Decisions respect.     | 1   | 5   | 4.55 | 0.66 |
| 14. Servant Leadership                | 1   | 5   | 4.30 | 0.77 |
| 15. Distributing Rewards Fairly       | 1   | 5   | 4.28 | 0.85 |
| 16. Responsibility for Others         | 1   | 5   | 4.24 | 0.81 |
| 17. Financial Ethics                  | 1   | 5   | 4.17 | 0.93 |
| 18. Honesty and Integrity             | 1   | 5   | 4.76 | 0.59 |
| 19. Being Accountable                 | 1   | 5   | 4.71 | 0.61 |
| 20. Time Management                   | 1   | 5   | 4.24 | 0.71 |
| 21. Goal Orientation                  | 2   | 5   | 4.21 | 0.66 |
| 22. Taking Initiatives                | 1   | 5   | 4.13 | 0.74 |
| 23. Effort: achieve goals             | 1   | 5   | 4.26 | 0.73 |
| 24. Persistence: despite challenges   | 2   | 5   | 4.32 | 0.71 |
| 25. Self Control                      | 1   | 5   | 4.17 | 0.80 |
| 26. Stress Tolerance                  | 2   | 5   | 4.36 | 0.67 |
| 27. Adaptability                      | 1   | 5   | 4.45 | 0.73 |
| 28. Self Reliance                     | 1   | 5   | 4.21 | 0.79 |
| 29. Continuous Learning               | 1   | 5   | 4.36 | 0.71 |
| 30. Seeking Feedback                  | 1   | 5   | 4.35 | 0.72 |
| 31. Communicating with Co-workers     | 2   | 5   | 4.51 | 0.67 |
| 32. Active Listening                  | 1   | 5   | 4.50 | 0.71 |
| 33. Facilitating Discussion           | 1   | 5   | 4.37 | 0.71 |
| 34. Developing External Contacts      | 1   | 5   | 4.11 | 0.80 |
| 35. Psychological Knowledge           | 2   | 5   | 4.02 | 0.79 |
| 36. Social Perceptiveness             | 2   | 5   | 4.10 | 0.75 |
| 37. Nurturing Relationships           | 2   | 5   | 4.32 | 0.69 |
| 38. Taking Charge                     | 2   | 5   | 4.20 | 0.73 |
| 39. Orienting Others                  | 1   | 5   | 4.10 | 0.80 |
| 40. Setting Goals for Others          | 2   | 5   | 4.00 | 0.77 |
| 41. Reinforcing Success               | 3   | 5   | 4.18 | 0.68 |
| 42. Developing and Building Teams     | 2   | 5   | 4.32 | 0.69 |
| 43. Knowing Principles of Learning    | 2   | 5   | 3.94 | 0.83 |
| 44. Assessing Others                  | 2   | 5   | 4.07 | 0.71 |

|                                     |   |   |      |      |
|-------------------------------------|---|---|------|------|
| 45. Coaching, Develop, Instructing  | 1 | 5 | 4.23 | 0.76 |
| 46. Cooperating                     | 1 | 5 | 4.36 | 0.66 |
| 47. Resolving Conflicts/Negotiating | 2 | 5 | 4.44 | 0.62 |
| 48. Empowerment                     | 2 | 5 | 4.38 | 0.71 |
| 49. Political Savvy                 | 1 | 5 | 4.10 | 0.88 |
| 50. Critical Thinking               | 2 | 5 | 4.41 | 0.68 |
| 51. Creative Problem Solving        | 1 | 5 | 4.44 | 0.72 |
| 52. Identifying Problems            | 3 | 5 | 4.44 | 0.64 |
| 53. Seeking Improvement             | 2 | 5 | 4.17 | 0.76 |
| 54. Openness to Ideas               | 1 | 5 | 4.46 | 0.70 |
| 55. Collaborating                   | 1 | 5 | 4.36 | 0.74 |
| 56. Perceiving Systems              | 2 | 5 | 4.15 | 0.76 |
| 57. Evaluating Consequences         | 2 | 5 | 4.21 | 0.76 |
| 58. Visioning                       | 2 | 5 | 4.02 | 0.88 |
| 59. Managing the Future             | 2 | 5 | 4.20 | 0.75 |
| 60. Sensitivity to Situations       | 2 | 5 | 4.16 | 0.75 |
| 61. Challenging the Status Quo      | 1 | 5 | 4.24 | 0.82 |
| 62. Intelligent Risk-Taking         | 2 | 5 | 4.21 | 0.75 |
| 63. Reinforcing Change              | 2 | 5 | 4.29 | 0.69 |

**Table 2: Principal Components Orthogonally Rotated Varimax Factor Matrix to the Normalized Kaiser Criterion\***

| Items                                   | Factors                       |                 |                         |                         |                             |
|-----------------------------------------|-------------------------------|-----------------|-------------------------|-------------------------|-----------------------------|
|                                         | 1<br>Social<br>Responsibility | 2<br>Innovation | 3<br>Self<br>Management | 4<br>Task<br>Management | 5<br>Justice<br>Orientation |
| Succession<br>Planning<br>/Recruiting   |                               |                 |                         | .636 TM                 |                             |
| Personnel<br>Decision Quality           |                               |                 |                         | .578 TM                 |                             |
| Maintaining<br>Safety                   |                               |                 |                         |                         | .480 TM                     |
| Enhancing Task<br>Knowledge             |                               |                 |                         | .401 TM                 |                             |
| Eliminating<br>Barriers                 |                               |                 |                         | .457 TM                 |                             |
| Strategic Task<br>Management            |                               |                 |                         | .540 TM                 |                             |
| Communication<br>with Community         |                               |                 |                         |                         |                             |
| Providing a Good<br>Example             | .511 SR                       |                 |                         |                         |                             |
| Knowledge of<br>Organization<br>Justice |                               |                 |                         |                         | .546 SR                     |
| Legal<br>Regulations                    |                               |                 |                         |                         | .674 SR                     |
| Open-Door<br>Policy                     | .677SR                        |                 |                         |                         |                             |
| Explaining<br>Decisions respect         | .698SR                        |                 |                         |                         |                             |
| Servant<br>Leadership                   | .563 SR                       |                 |                         |                         |                             |
| Distributing<br>Rewards Fairly          | .434 SR                       |                 |                         |                         |                             |
| Responsibility for<br>Others            |                               |                 |                         | .486 SR                 |                             |
| Honesty and<br>Integrity                | .810 SR                       |                 |                         |                         |                             |
| Being<br>Accountable                    | .806 SR                       |                 |                         |                         |                             |
| Goal Orientation                        |                               |                 | .544 SM                 |                         |                             |
| Taking Initiatives                      |                               |                 | .515 SM                 |                         |                             |
| Effort: achieve                         |                               |                 | .576 SM                 |                         |                             |

|                                          |         |         |         |  |         |
|------------------------------------------|---------|---------|---------|--|---------|
| goals                                    |         |         |         |  |         |
| Persistence:<br>despite<br>challenges    |         |         | .516 SM |  |         |
| Self Control                             |         |         | .484 SM |  |         |
| Stress Tolerance                         |         |         | .530 SM |  |         |
| Adaptability                             | .651 SM |         |         |  |         |
| Self Reliance                            |         |         | .623 SM |  |         |
| Continuous<br>Learning                   |         |         | .431 SM |  |         |
| Seeking<br>Feedback                      | .506 SM |         |         |  |         |
| Communicating<br>with Co-workers         | .511 LO |         |         |  |         |
| Active Listening                         | .658 LO |         |         |  |         |
| Facilitating<br>Discussion               | .494 LO |         |         |  |         |
| Developing and<br>Building Teams         |         | .498LO  |         |  |         |
| Psychological<br>Knowledge               |         | .593LO  |         |  |         |
| Social<br>Perceptiveness                 |         | .649LO  |         |  |         |
| Setting Goals for<br>Others              |         |         | .568 LO |  |         |
| Knowing<br>Principles of<br>Learning     |         | .565LO  |         |  |         |
| Assessing Others                         |         | .495 LO |         |  | .567 LO |
| Coaching,<br>Development,<br>Instruction |         | .546 LO |         |  | .405 LO |
| Cooperating                              | .603 LO |         |         |  |         |
| Empowerment                              | .425 LO |         |         |  |         |
| Political Savvy                          |         | .596LO  |         |  |         |
| Critical Thinking                        |         | .521IN  |         |  |         |
| Creative Problem<br>Solving              | .473 LO | .529IN  |         |  |         |
| Identifying<br>Problems                  |         | .509IN  |         |  |         |

|                            |        |        |       |       |       |
|----------------------------|--------|--------|-------|-------|-------|
| Openness to Ideas          | .654IN |        |       |       |       |
| Collaborating              | .542IN | .418IN |       |       |       |
| Perceiving Systems         |        | .643IN |       |       |       |
| Evaluating Consequences    |        | .616IN |       |       |       |
| Visioning                  |        | .657IN |       |       |       |
| Managing the Future        |        | .720IN |       |       |       |
| Sensitivity to Situations  |        | .664IN |       |       |       |
| Challenging the Status Quo | .437IN | .499IN |       |       |       |
| Intelligent Risk-Taking    |        | .642IN |       |       |       |
| Reinforcing Change         |        | .537IN |       |       |       |
|                            |        |        |       |       |       |
| Eigenvalue                 | 35.55  | 5.68   | 3.66  | 3.48  | 3.12  |
| % of Variance              | 16.63  | 15.35  | 7.09  | 6.92  | 5.19  |
| M                          | 69.52  | 79.00  | 37.71 | 25.82 | 20.95 |
| SD                         | 8.22   | 10.15  | 4.56  | 3.06  | 2.73  |
| Cronbach`s alpha           | 0.93   | 0.93   | 0.84  | 0.72  | 0.93  |

\*Extraction Method: Principal Component Analysis. Rotation Method: Varimax with Kaiser Normalization; Rotation converged in 12 iterations; SR = Social Responsibility; LO = Leading Others; SM = Self Management; I = Innovation; TM = Task Management.



**Table 3: Means and Standard Deviations for the Five Subscales for Sex and Language**

|                              | Sex    | Language | M     | SD    | n   |
|------------------------------|--------|----------|-------|-------|-----|
| <b>Social Responsibility</b> | Male   | English  | 67.40 | 11.05 | 47  |
|                              |        | German   | 68.60 | 7.72  | 45  |
|                              |        | Total    | 67.99 | 9.54  | 92  |
|                              | Female | English  | 71.31 | 7.35  | 90  |
|                              |        | German   | 68.63 | 6.32  | 43  |
|                              |        | Total    | 70.44 | 7.12  | 133 |
|                              | Total  | English  | 69.97 | 8.95  | 137 |
|                              |        | German   | 68.61 | 7.03  | 88  |
|                              |        | Total    | 69.44 | 8.26  | 225 |
| <b>Innovation*</b>           | Male   | English  | 77.68 | 11.94 | 47  |
|                              |        | German   | 77.38 | 10.95 | 45  |
|                              |        | Total    | 77.53 | 11.41 | 92  |
|                              | Female | English  | 80.99 | 9.00  | 90  |
|                              |        | German   | 77.33 | 8.54  | 43  |
|                              |        | Total    | 79.80 | 8.99  | 133 |
|                              | Total  | English  | 79.85 | 10.18 | 137 |
|                              |        | German   | 77.35 | 9.79  | 88  |
|                              |        | Total    | 78.88 | 10.09 | 225 |
| <b>Self Management</b>       | Male   | English  | 37.57 | 5.06  | 47  |
|                              |        | German   | 37.56 | 4.93  | 45  |
|                              |        | Total    | 37.57 | 4.97  | 92  |
|                              | Female | English  | 38.32 | 4.23  | 90  |
|                              |        | German   | 36.60 | 4.28  | 43  |
|                              |        | Total    | 37.77 | 4.31  | 133 |
|                              | Total  | English  | 38.07 | 4.53  | 137 |
|                              |        | German   | 37.09 | 4.62  | 88  |
|                              |        | Total    | 37.68 | 4.58  | 225 |
| <b>Task Management</b>       | Male   | English  | 25.68 | 3.25  | 47  |
|                              |        | German   | 25.69 | 2.75  | 45  |
|                              |        | Total    | 25.68 | 3.00  | 92  |
|                              | Female | English  | 25.84 | 3.31  | 90  |
|                              |        | German   | 25.77 | 2.67  | 43  |
|                              |        | Total    | 25.82 | 3.11  | 133 |
|                              | Total  | English  | 25.79 | 3.28  | 137 |
|                              |        | German   | 25.73 | 2.69  | 88  |
|                              |        | Total    | 25.76 | 3.06  | 225 |
| <b>Justice Orientation*</b>  | Male   | English  | 20.74 | 3.17  | 47  |
|                              |        | German   | 19.98 | 2.84  | 45  |
|                              |        | Total    | 20.37 | 3.02  | 92  |
|                              | Female | English  | 21.96 | 2.30  | 90  |
|                              |        | German   | 20.19 | 2.35  | 43  |
|                              |        | Total    | 21.38 | 2.45  | 133 |
|                              | Total  | English  | 21.54 | 2.68  | 137 |
|                              |        | German   | 20.08 | 2.60  | 88  |
|                              |        | Total    | 20.97 | 2.74  | 225 |

\*p &lt; .05

**Table 4: Means and Standard Deviations between Physicians and Other Health****Professionals**

|                         | Physicians versus Health Professions | M     | SD    | n   |
|-------------------------|--------------------------------------|-------|-------|-----|
| Social Responsibility** | Physicians                           | 67.12 | 9.58  | 91  |
|                         | Health Professionals                 | 71.09 | 6.76  | 138 |
|                         | Total                                | 69.51 | 8.22  | 229 |
| Innovation**            | Physicians                           | 76.20 | 10.53 | 91  |
|                         | Health Professionals                 | 80.83 | 9.32  | 138 |
|                         | Total                                | 78.99 | 10.05 | 229 |
| Self Management         | Physicians                           | 37.12 | 5.00  | 91  |
|                         | Health Professionals                 | 38.09 | 4.22  | 138 |
|                         | Total                                | 37.70 | 4.56  | 229 |
| Task Management         | Physicians                           | 25.51 | 3.06  | 91  |
|                         | Health Professionals                 | 26.00 | 3.05  | 138 |
|                         | Total                                | 25.81 | 3.05  | 229 |
| Justice Orientation*    | Physicians                           | 20.46 | 2.85  | 91  |
|                         | Health Professionals                 | 21.27 | 2.61  | 138 |
|                         | Total                                | 20.95 | 2.73  | 229 |

\*p < .05; \*\*p < .01

## APPENDIX A

**Table (Appendix D):** shows the questioner of Wagner et al. (2004), consisting 107 questions.

\* = excluded questions in the present study

\*\* = included questions in the present study

| <b>Part 1 of 5: Task Management Competencies</b>       |                                                                                                                                                                                                                                                                                    |
|--------------------------------------------------------|------------------------------------------------------------------------------------------------------------------------------------------------------------------------------------------------------------------------------------------------------------------------------------|
| 1.                                                     | * <i>Performing Administrative Activities: Approving requests, handling paperwork, and performing other daily administrative tasks. Entering, transcribing, recording, or storing either written or electronic information.</i>                                                    |
| 2.                                                     | ** <i>Maintaining Quality: Evaluating materials and information produced against a set of standards through the use of measures of quality in order to track system and/or group progress.</i>                                                                                     |
| 3.                                                     | ** <i>Succession Planning/Recruiting: Examining organizational structure to identify staffing issues needed to achieve strategic objectives. Attracting many qualified applicants for open positions within the organization.</i>                                                  |
| 4.                                                     | ** <i>Personnel Decision Quality: Making good personnel decisions by identifying and assessing the knowledge, skills, and experiences needed to successfully perform a role in the organization.</i>                                                                               |
| 5.                                                     | * <i>Managing Personnel Policies: Developing and monitoring policies, programs, and procedures related to work practices and compensation.</i>                                                                                                                                     |
| 6.                                                     | ** <i>Maintaining Safety: Minimizing potential safety hazards and maintaining compliance with company policies, safety laws, and regulations.</i>                                                                                                                                  |
| 7.                                                     | ** <i>Enhancing Task Knowledge: Involving the group in discovering methods to enhance task performance and redirecting the group to achieve better task completion.</i>                                                                                                            |
| 8.                                                     | ** <i>Eliminating Barriers to Performance: Identifying roadblocks and redundancies in work processes. Promoting improvements in task performance.</i>                                                                                                                              |
| 9.                                                     | * <i>Benchmarking: Looking outside of the leaders' organization to identify the best practices in task design and performance and integrate these into the leaders' organization.</i>                                                                                              |
| 10.                                                    | ** <i>Strategic Task Management: Matching the appropriate people and resources in the organization to maximize task performance.</i>                                                                                                                                               |
| <b>Part 2 of 5: Social Responsibility Competencies</b> |                                                                                                                                                                                                                                                                                    |
| 11.                                                    | ** <i>Communicating with the Community: Communicating the organization's intentions and activities to the public (e.g., local press, radio, television) and representing the organization in community affairs and public activities to promote awareness and foster goodwill.</i> |
| 12.                                                    | * <i>Helping the Community: Meeting community needs by promoting opportunities for corporate giving of financial and human resources.</i>                                                                                                                                          |
| 13.                                                    | * <i>Civic Action: Supporting participation in civic duties by encouraging others to vote and engaging in other duties of the political system.</i>                                                                                                                                |
| 14.                                                    | * <i>Adopting Beneficial Values for Society: Embracing and endorsing values that benefit society at large (not just the leader's organization).</i>                                                                                                                                |
| 15.                                                    | ** <i>Providing a Good Example: Acting in accordance with society's and the organization's laws, rules, and guidelines, and behaving in fair and ethical manner.</i>                                                                                                               |
| 16.                                                    | * <i>Social Action: Affecting needed changes in one's community or country by advocating for under-represented or needy groups.</i>                                                                                                                                                |
| 17.                                                    | * <i>Sociology and Anthropology Knowledge: Knowledge of the political systems, values, beliefs, economic practices, and leadership styles of countries other than one's home country, as well as knowledge of universal group dynamics, behavior, and socio-cultural history.</i>  |
| 18.                                                    | * <i>History and Geography Knowledge: Knowledge of the physical location and relationships between different land and sea regions and the historical events that have shaped the culture of inhabitants of these regions.</i>                                                      |
| 19.                                                    | * <i>Foreign Language Knowledge: Understanding a non-native language in order to communicate in oral and written form with people who speak that language.</i>                                                                                                                     |
| 20.                                                    | * <i>Philosophy and Theology Knowledge: Knowledge of ethics and the philosophical viewpoints behind various ethical models and understanding how different philosophical and religious systems affect behavior of groups and individuals within a cultural context.</i>            |
| 21.                                                    | ** <i>Knowledge of Organizational Justice Principles: Knowing and understanding fairness principles and being able to apply them to ensure subordinates are treated fairly. May include knowledge and</i>                                                                          |

|    |                                                                                                                                                                                                                                                                                                                                                  |
|----|--------------------------------------------------------------------------------------------------------------------------------------------------------------------------------------------------------------------------------------------------------------------------------------------------------------------------------------------------|
| 1  |                                                                                                                                                                                                                                                                                                                                                  |
| 2  |                                                                                                                                                                                                                                                                                                                                                  |
| 3  | <i>application of equity theory/distributive justice, procedural, interpersonal and informational justice concepts.</i>                                                                                                                                                                                                                          |
| 4  |                                                                                                                                                                                                                                                                                                                                                  |
| 5  | 22. <b>**Legal Regulations:</b> Awareness of local, state, and federal laws and regulations and abiding by these regulations at all times.                                                                                                                                                                                                       |
| 6  |                                                                                                                                                                                                                                                                                                                                                  |
| 7  | 23. <b>**Open-Door Policy:</b> Promoting a climate of openness and trust. Allowing individuals who are upset about an aspect of the organization to voice displeasures without retribution or repercussions.                                                                                                                                     |
| 8  |                                                                                                                                                                                                                                                                                                                                                  |
| 9  | 24. <b>* Instituting and Following Fair Procedures:</b> Instituting and applying rules and procedures in a consistent, unbiased, accurate, and correctable fashion to ensure that subordinates know that fair rules are being used.                                                                                                              |
| 10 |                                                                                                                                                                                                                                                                                                                                                  |
| 11 | 25. <b>**Explaining Decisions in a Respectful Manner:</b> Explaining decisions that affect subordinates thoroughly and in a manner that demonstrates dignity and respect for the subordinates.                                                                                                                                                   |
| 12 |                                                                                                                                                                                                                                                                                                                                                  |
| 13 | 26. <b>* Ensuring Ethical Behavior of Subordinates:</b> Implementing policies that ensure subordinates treat each other and the organization fairly and with dignity. Disseminating information about laws and regulations to subordinates and make sure that they follow laws and regulations by overseeing, monitoring, and auditing behavior. |
| 14 |                                                                                                                                                                                                                                                                                                                                                  |
| 15 | 27. <b>**Servant Leadership:</b> Being attentive to the needs of followers, empathizing with their concerns, and serving their best interests.                                                                                                                                                                                                   |
| 16 |                                                                                                                                                                                                                                                                                                                                                  |
| 17 | 28. <b>* Valuing Diversity:</b> Encouraging a wide range of viewpoints among team members to promote healthy group process and arrive at culturally sensitive solutions.                                                                                                                                                                         |
| 18 |                                                                                                                                                                                                                                                                                                                                                  |
| 19 | 29. <b>**Distributing Rewards Fairly:</b> Ensuring that pay, recognition, and other rewards are distributed in a fair manner, with clear guidelines and enforcement of those guidelines.                                                                                                                                                         |
| 20 |                                                                                                                                                                                                                                                                                                                                                  |
| 21 | 30. <b>**Responsibility for Others:</b> Willingness to be responsible for the behavior of subordinates in one's organization and correct their unethical behaviors.                                                                                                                                                                              |
| 22 |                                                                                                                                                                                                                                                                                                                                                  |
| 23 | 31. <b>* Avoiding Exploitative Mentality:</b> Concern for others not sacrificed in the pursuit of organizational goals.                                                                                                                                                                                                                          |
| 24 |                                                                                                                                                                                                                                                                                                                                                  |
| 25 | 32. <b>**Financial Ethics:</b> Understanding and following ethical financial management and accounting principles.                                                                                                                                                                                                                               |
| 26 |                                                                                                                                                                                                                                                                                                                                                  |
| 27 | 33. <b>* Work-Place Ethics:</b> Understanding and following ethical guidelines at one's work place.                                                                                                                                                                                                                                              |
| 28 |                                                                                                                                                                                                                                                                                                                                                  |
| 29 | 34. <b>**Honesty and Integrity:</b> Behaving in an honest and ethical manner.                                                                                                                                                                                                                                                                    |
| 30 |                                                                                                                                                                                                                                                                                                                                                  |
| 31 | 35. <b>**Being Accountable:</b> Accepting responsibility for the effects of one's own actions.                                                                                                                                                                                                                                                   |
| 32 |                                                                                                                                                                                                                                                                                                                                                  |
| 33 | 36. <b>* Courage of Convictions:</b> Avoiding behavior that is unethical even if the unethical behavior is encouraged by the public or by public opinion. Upholding decisions that are ethical but perhaps unpopular.                                                                                                                            |
| 34 |                                                                                                                                                                                                                                                                                                                                                  |
| 35 | <b>Part 3 of 5: Self Management Competencies</b>                                                                                                                                                                                                                                                                                                 |
| 36 | 37. <b>**Time Management:</b> Organizing, prioritizing and scheduling tasks in order to maximize the efficiency of how time is used.                                                                                                                                                                                                             |
| 37 |                                                                                                                                                                                                                                                                                                                                                  |
| 38 | 38. <b>**Goal Orientation:</b> Setting and attaining specific and challenging goals for oneself.                                                                                                                                                                                                                                                 |
| 39 |                                                                                                                                                                                                                                                                                                                                                  |
| 40 | 39. <b>* Organization Skills:</b> Organizing responsibilities so they can be performed with a maximum level of efficiency.                                                                                                                                                                                                                       |
| 41 |                                                                                                                                                                                                                                                                                                                                                  |
| 42 | 40. <b>Work Ethic:</b> Being disciplined and diligent in the course of completing job tasks to ensure their successful completion.                                                                                                                                                                                                               |
| 43 |                                                                                                                                                                                                                                                                                                                                                  |
| 44 | 41. <b>* Follow Through:</b> Ensuring that one's promises are realized in behaviour; or "doing what one said one would do."                                                                                                                                                                                                                      |
| 45 |                                                                                                                                                                                                                                                                                                                                                  |
| 46 | 42. <b>**Initiative:</b> Taking on new challenges.                                                                                                                                                                                                                                                                                               |
| 47 |                                                                                                                                                                                                                                                                                                                                                  |
| 48 | 43. <b>**Effort:</b> Exerting oneself to complete tasks successfully and achieve goals.                                                                                                                                                                                                                                                          |
| 49 |                                                                                                                                                                                                                                                                                                                                                  |
| 50 | 44. <b>**Persistence:</b> Enduring in one's tasks despite challenges or difficulties.                                                                                                                                                                                                                                                            |
| 51 |                                                                                                                                                                                                                                                                                                                                                  |
| 52 | 45. <b>* Energy:</b> Maintaining enthusiasm as progress is made toward the completion of a task.                                                                                                                                                                                                                                                 |
| 53 |                                                                                                                                                                                                                                                                                                                                                  |
| 54 | 46. <b>* Optimism:</b> Having a positive outlook about oneself and others.                                                                                                                                                                                                                                                                       |
| 55 |                                                                                                                                                                                                                                                                                                                                                  |
| 56 | 47. <b>**Self Control:</b> Controlling one's emotions even in difficult or challenging situations.                                                                                                                                                                                                                                               |
| 57 |                                                                                                                                                                                                                                                                                                                                                  |
| 58 | 48. <b>**Stress Tolerance:</b> Remaining effective even when situations become stressful.                                                                                                                                                                                                                                                        |
| 59 |                                                                                                                                                                                                                                                                                                                                                  |
| 60 | 49. <b>* Personal Resiliency:</b> Withstanding and overcoming stressful situations.                                                                                                                                                                                                                                                              |
|    |                                                                                                                                                                                                                                                                                                                                                  |
|    | 50. <b>* Work/Life Balance:</b> Controlling the reciprocal influence of stresses of one's non-work and work lives.                                                                                                                                                                                                                               |
|    |                                                                                                                                                                                                                                                                                                                                                  |
|    | 51. <b>**Adaptability:</b> Adapting to changing or dynamic situations.                                                                                                                                                                                                                                                                           |
|    |                                                                                                                                                                                                                                                                                                                                                  |
|    | 52. <b>* Self Confidence:</b> Believing in one's self and in one's ability to perform a successful job as a leader and acting accordingly.                                                                                                                                                                                                       |
|    |                                                                                                                                                                                                                                                                                                                                                  |
|    | 53. <b>* Self Awareness:</b> Ability to honestly assess levels of success in learning or working activities. Knowledge of one's strengths and weaknesses.                                                                                                                                                                                        |
|    |                                                                                                                                                                                                                                                                                                                                                  |
|    | 54. <b>**Self Reliance:</b> Being able to perform at a high level without the guidance or supervision of others.                                                                                                                                                                                                                                 |

|    |                                                                                                                                                                                                                                                                                            |
|----|--------------------------------------------------------------------------------------------------------------------------------------------------------------------------------------------------------------------------------------------------------------------------------------------|
| 1  | 55. <i>* Humility: Being able to have a realistic perspective of one's worth and ability and admit mistakes.</i>                                                                                                                                                                           |
| 2  | 56. <i>* Suspending Judgment: Keeping one's personal beliefs and biases from overly influencing one's decisions.</i>                                                                                                                                                                       |
| 3  | 57. <i>* Learning Strategies: Devising plans to develop oneself through the use of multiple approaches.</i>                                                                                                                                                                                |
| 4  | 58. <i>* Intellectual Curiosity: Valuing learning and seeking situations that increase one's knowledge.</i>                                                                                                                                                                                |
| 5  | 59. <i>**Continuous Learning: Keeping informed on updated information within the leader's profession, and keeping up to date on information about leadership in general.</i>                                                                                                               |
| 6  | 60. <i>**Seeking Feedback: Willingness to seek feedback on one's performance as a leader and to use that feedback to learn and grow as a leader.</i>                                                                                                                                       |
| 7  | <b>Part 4 of 5: Leading Others Competencies</b>                                                                                                                                                                                                                                            |
| 8  | 61. <i>**Communicating with Co-workers: Communicating information coherently using either face-to-face, written, or via telephone or computer.</i>                                                                                                                                         |
| 9  | 62. <i>**Active Listening: Listening intently to what others are saying and asking for further details when appropriate.</i>                                                                                                                                                               |
| 10 | 63. <i>**Facilitating Discussion: Promoting openness and courtesy during group work in order to encourage involvement of all group members in completing tasks.</i>                                                                                                                        |
| 11 | 64. <i>* Public Speaking: Vocalizing clearly, maintaining a comfortable pace, and using appropriate non-verbal behaviours during formal presentations. Utilizing visual aids during presentations. Engaging the audience and responding to questions from the audience.</i>                |
| 12 | 65. <i>**Developing External Contacts: Developing and maintaining contacts with the professional community outside of the organization the leader is working in.</i>                                                                                                                       |
| 13 | 66. <i>* Communicating Outside the Organization: Exchanging information with others outside the organization (e.g., customers, other organizations) using face-to-face or written communications, the telephone, or electronic means.</i>                                                  |
| 14 | 67. <i>**Psychological Knowledge: Knowledge of human behavior, mental processes, and individual and group performance.</i>                                                                                                                                                                 |
| 15 | 68. <i>* Social Orientation: Being comfortable interacting and working with others.</i>                                                                                                                                                                                                    |
| 16 | 69. <i>**Social Perceptiveness: Awareness and understanding of how and why others are reacting the way they are.</i>                                                                                                                                                                       |
| 17 | 70. <i>* Service Orientation: Actively seeking out ways to assist others with their duties.</i>                                                                                                                                                                                            |
| 18 | 71. <i>**Nurturing Relationships: Building positive and cooperative working relationships with others and maintaining those relationships over time.</i>                                                                                                                                   |
| 19 | 72. <i>**Taking Charge: Initiating the activities of a group and leading them toward common goals.</i>                                                                                                                                                                                     |
| 20 | 73. <i>**Orienting Others: Providing new employees an overview of the organization and its policies, work rules, and job responsibilities.</i>                                                                                                                                             |
| 21 | 74. <i>**Setting Goals for Others: Setting challenging but attainable goals for individuals and groups. Specifying actions, strategies and timelines necessary for goal attainment.</i>                                                                                                    |
| 22 | 75. <i>**Reinforcing Success: Measuring and tracking progress toward goals to evaluate individual and group performance and provide feedback. Rewarding others' positive work behavior to reinforce activities that are aligned with the goals of the work group and the organization.</i> |
| 23 | 76. <i>**Developing and Building Teams: Effectively managing groups during the early stages of group functioning. Promoting cooperation, trust, and confidence to enhancing the performance of a group and the satisfaction of group members.</i>                                          |
| 24 | 77. <i>**Knowledge of Principles of Learning: Knowledge of learning theories and how to design individual and group teaching activities.</i>                                                                                                                                               |
| 25 | 78. <i>* Interpreting the Meaning of Information for Others: Translating or explaining information in a way that it can be understood by others.</i>                                                                                                                                       |
| 26 | 79. <i>**Assessing Others: Evaluating the strengths and weaknesses of others' efforts at learning or performing tasks.</i>                                                                                                                                                                 |
| 27 | 80. <i>**Coaching, Developing, Instructing: Coaching, teaching, and advising others to help them develop their knowledge and skills. Creating individual development plans. Selecting appropriate training courses to address developmental needs.</i>                                     |
| 28 | 81. <i>**Cooperating: Working well with others to jointly achieve goals.</i>                                                                                                                                                                                                               |
| 29 | 82. <i>* Persuading: Convincing others to perform a task or to approach a problem in a different manner.</i>                                                                                                                                                                               |
| 30 | 83. <i>**Resolving Conflicts/Negotiating: Dealing with complaints, resolving conflicts, and addressing the grievances of others. Encouraging others to reconcile differences together.</i>                                                                                                 |
| 31 | 84. <i>**Empowering: Delegating authority and investing power in others.</i>                                                                                                                                                                                                               |
| 32 | 85. <i>* Inspiring: Convincing others to believe in the organization's values and to act in accordance with those values.</i>                                                                                                                                                              |
| 33 |                                                                                                                                                                                                                                                                                            |
| 34 |                                                                                                                                                                                                                                                                                            |
| 35 |                                                                                                                                                                                                                                                                                            |
| 36 |                                                                                                                                                                                                                                                                                            |
| 37 |                                                                                                                                                                                                                                                                                            |
| 38 |                                                                                                                                                                                                                                                                                            |
| 39 |                                                                                                                                                                                                                                                                                            |
| 40 |                                                                                                                                                                                                                                                                                            |
| 41 |                                                                                                                                                                                                                                                                                            |
| 42 |                                                                                                                                                                                                                                                                                            |
| 43 |                                                                                                                                                                                                                                                                                            |
| 44 |                                                                                                                                                                                                                                                                                            |
| 45 |                                                                                                                                                                                                                                                                                            |
| 46 |                                                                                                                                                                                                                                                                                            |
| 47 |                                                                                                                                                                                                                                                                                            |
| 48 |                                                                                                                                                                                                                                                                                            |
| 49 |                                                                                                                                                                                                                                                                                            |
| 50 |                                                                                                                                                                                                                                                                                            |
| 51 |                                                                                                                                                                                                                                                                                            |
| 52 |                                                                                                                                                                                                                                                                                            |
| 53 |                                                                                                                                                                                                                                                                                            |
| 54 |                                                                                                                                                                                                                                                                                            |
| 55 |                                                                                                                                                                                                                                                                                            |
| 56 |                                                                                                                                                                                                                                                                                            |
| 57 |                                                                                                                                                                                                                                                                                            |
| 58 |                                                                                                                                                                                                                                                                                            |
| 59 |                                                                                                                                                                                                                                                                                            |
| 60 |                                                                                                                                                                                                                                                                                            |



|    |                                                                                                                                                                                                                                                                    |
|----|--------------------------------------------------------------------------------------------------------------------------------------------------------------------------------------------------------------------------------------------------------------------|
| 1  | 86. <i>**Political Savvy: Knowledge of the political climate of their organization and how decisions/outcomes will be affected by that climate.</i>                                                                                                                |
| 2  |                                                                                                                                                                                                                                                                    |
| 3  |                                                                                                                                                                                                                                                                    |
| 4  |                                                                                                                                                                                                                                                                    |
| 5  | <b>Part 5 of 5: Innovation Competencies</b>                                                                                                                                                                                                                        |
| 6  | 87. <i>* Generating Ideas: Devising a variety of approaches to solving a problem.</i>                                                                                                                                                                              |
| 7  | 88. <i>**Critical Thinking: Understanding the strengths and weaknesses of different approaches to solving a problem, and making decisions based on this evaluation.</i>                                                                                            |
| 8  |                                                                                                                                                                                                                                                                    |
| 9  | 89. <i>* Synthesis/Reorganization: Combining known information about a problem and reevaluating it to find better solutions.</i>                                                                                                                                   |
| 10 | 90. <i>**Creative Problem Solving: Using novel ideas to solve problems. Thinking "outside of the box."</i>                                                                                                                                                         |
| 11 | 91. <i>**Identifying Problems: Pinpointing the actual nature and cause of problems and the dynamics that underlie them.</i>                                                                                                                                        |
| 12 |                                                                                                                                                                                                                                                                    |
| 13 | 92. <i>**Seeking Improvement: Constantly seeking ways to improve the leader's organization.</i>                                                                                                                                                                    |
| 14 | 93. <i>* Gathering Information: Identifying useful sources of information. Isolating, gathering and utilizing only that information which is essential to solving a problem.</i>                                                                                   |
| 15 |                                                                                                                                                                                                                                                                    |
| 16 | 94. <i>* Independent Thinking: Autonomously engaging in problem solving processes. Ability to resist popular but irrational approaches toward solving a problem.</i>                                                                                               |
| 17 |                                                                                                                                                                                                                                                                    |
| 18 | 95. <i>* Technological Savvy: Understanding and utilizing technology to improve work processes.</i>                                                                                                                                                                |
| 19 | 96. <i>**Openness to Ideas: A willingness to listen to suggestions from others and to try new ideas.</i>                                                                                                                                                           |
| 20 | 97. <i>* Research Orientation: Observing the behavior of others, reading extensively, and keeping an open mind toward ideas and solutions from others. Reading and talking to people in related fields to discover innovations or current trends in the field.</i> |
| 21 |                                                                                                                                                                                                                                                                    |
| 22 | 98. <i>**Collaborating: Working with and seeking the opinions of others.</i>                                                                                                                                                                                       |
| 23 |                                                                                                                                                                                                                                                                    |
| 24 | 99. <i>* Engaging in Non-Work Related Interests: Being "well-rounded." Seeking out information from other fields and areas of life to find information applicable to one's own situation.</i>                                                                      |
| 25 |                                                                                                                                                                                                                                                                    |
| 26 | 100. <i>**Perceiving Systems: Understanding important changes that occur in an organizational system and/or predicting accurately when change might occur.</i>                                                                                                     |
| 27 |                                                                                                                                                                                                                                                                    |
| 28 | 101. <i>**Evaluating Long-Term Consequences: Understanding how a change in an organizational system will effect the system in the long-term.</i>                                                                                                                   |
| 29 |                                                                                                                                                                                                                                                                    |
| 30 | 102. <i>**Visioning: Developing, disseminating, and "selling" an image of an ideal working state of the leader's organization.</i>                                                                                                                                 |
| 31 |                                                                                                                                                                                                                                                                    |
| 32 | 103. <i>**Managing the Future: Evaluating future directions and risks based on current and prospective strengths, weaknesses, opportunities and threats.</i>                                                                                                       |
| 33 |                                                                                                                                                                                                                                                                    |
| 34 | 104. <i>**Sensitivity to Situations: Assessing situational forces and variables that are promoting or inhibiting changes in an organization.</i>                                                                                                                   |
| 35 |                                                                                                                                                                                                                                                                    |
| 36 | 105. <i>**Challenging the Status Quo: Willingness to act against the way things have traditionally been done when these traditions are found to actually hinder performance or prevent improvements.</i>                                                           |
| 37 |                                                                                                                                                                                                                                                                    |
| 38 | 106. <i>**Intelligent Risk-Taking: Willingness and ability to evaluate risk and reward information. Using that information to determine the appropriateness of making a potentially risky decision.</i>                                                            |
| 39 |                                                                                                                                                                                                                                                                    |
| 40 | 107. <i>**Reinforcing Change: Encouraging subordinates to come up with innovative solutions. Recognizing and rewarding those who take initiative and act in a creative manner. Facilitating the institutionalization of change initiatives.</i>                    |
| 41 |                                                                                                                                                                                                                                                                    |
| 42 |                                                                                                                                                                                                                                                                    |
| 43 |                                                                                                                                                                                                                                                                    |
| 44 |                                                                                                                                                                                                                                                                    |
| 45 |                                                                                                                                                                                                                                                                    |
| 46 |                                                                                                                                                                                                                                                                    |
| 47 |                                                                                                                                                                                                                                                                    |
| 48 |                                                                                                                                                                                                                                                                    |
| 49 |                                                                                                                                                                                                                                                                    |
| 50 |                                                                                                                                                                                                                                                                    |
| 51 |                                                                                                                                                                                                                                                                    |
| 52 |                                                                                                                                                                                                                                                                    |
| 53 |                                                                                                                                                                                                                                                                    |
| 54 |                                                                                                                                                                                                                                                                    |
| 55 |                                                                                                                                                                                                                                                                    |
| 56 |                                                                                                                                                                                                                                                                    |
| 57 |                                                                                                                                                                                                                                                                    |
| 58 |                                                                                                                                                                                                                                                                    |
| 59 |                                                                                                                                                                                                                                                                    |
| 60 |                                                                                                                                                                                                                                                                    |

**STROBE 2007 (v4) checklist of items to be included in reports of observational studies in epidemiology\***  
**Checklist for cohort, case-control, and cross-sectional studies (combined)**

| Section/Topic             | Item # | Recommendation                                                                                                                                                                                                                                                                                                                                                                                                                                                         | Reported on page # |
|---------------------------|--------|------------------------------------------------------------------------------------------------------------------------------------------------------------------------------------------------------------------------------------------------------------------------------------------------------------------------------------------------------------------------------------------------------------------------------------------------------------------------|--------------------|
| Title and abstract        | 1      | (a) Indicate the study's design with a commonly used term in the title or the abstract                                                                                                                                                                                                                                                                                                                                                                                 | 1, 5               |
|                           |        | (b) Provide in the abstract an informative and balanced summary of what was done and what was found                                                                                                                                                                                                                                                                                                                                                                    | 3                  |
| <b>Introduction</b>       |        |                                                                                                                                                                                                                                                                                                                                                                                                                                                                        |                    |
| Background/rationale      | 2      | Explain the scientific background and rationale for the investigation being reported                                                                                                                                                                                                                                                                                                                                                                                   | 5-8                |
| Objectives                | 3      | State specific objectives, including any pre-specified hypotheses                                                                                                                                                                                                                                                                                                                                                                                                      | 8                  |
| <b>Methods</b>            |        |                                                                                                                                                                                                                                                                                                                                                                                                                                                                        |                    |
| Study design              | 4      | Present key elements of study design early in the paper                                                                                                                                                                                                                                                                                                                                                                                                                | 3                  |
| Setting                   | 5      | Describe the setting, locations, and relevant dates, including periods of recruitment, exposure, follow-up, and data collection                                                                                                                                                                                                                                                                                                                                        | 8-10               |
| Participants              | 6      | (a) <i>Cohort study</i> —Give the eligibility criteria, and the sources and methods of selection of participants. Describe methods of follow-up<br><i>Case-control study</i> —Give the eligibility criteria, and the sources and methods of case ascertainment and control selection. Give the rationale for the choice of cases and controls<br><i>Cross-sectional study</i> —Give the eligibility criteria, and the sources and methods of selection of participants | 8-9                |
|                           |        | (b) <i>Cohort study</i> —For matched studies, give matching criteria and number of exposed and unexposed<br><i>Case-control study</i> —For matched studies, give matching criteria and the number of controls per case                                                                                                                                                                                                                                                 |                    |
| Variables                 | 7      | Clearly define all outcomes, exposures, predictors, potential confounders, and effect modifiers. Give diagnostic criteria, if applicable                                                                                                                                                                                                                                                                                                                               | 11                 |
| Data sources/ measurement | 8*     | For each variable of interest, give sources of data and details of methods of assessment (measurement). Describe comparability of assessment methods if there is more than one group                                                                                                                                                                                                                                                                                   | 9-10               |
| Bias                      | 9      | Describe any efforts to address potential sources of bias                                                                                                                                                                                                                                                                                                                                                                                                              | 10                 |
| Study size                | 10     | Explain how the study size was arrived at                                                                                                                                                                                                                                                                                                                                                                                                                              | 9                  |
| Quantitative variables    | 11     | Explain how quantitative variables were handled in the analyses. If applicable, describe which groupings were chosen and why                                                                                                                                                                                                                                                                                                                                           | 10                 |
| Statistical methods       | 12     | (a) Describe all statistical methods, including those used to control for confounding                                                                                                                                                                                                                                                                                                                                                                                  | 10                 |
|                           |        | (b) Describe any methods used to examine subgroups and interactions                                                                                                                                                                                                                                                                                                                                                                                                    | 10                 |
|                           |        | (c) Explain how missing data were addressed                                                                                                                                                                                                                                                                                                                                                                                                                            | 10                 |
|                           |        | (d) <i>Cohort study</i> —If applicable, explain how loss to follow-up was addressed<br><i>Case-control study</i> —If applicable, explain how matching of cases and controls was addressed                                                                                                                                                                                                                                                                              |                    |

|                          |     |                                                                                                                                                                                                                                                                                                                                                                                                               |             |
|--------------------------|-----|---------------------------------------------------------------------------------------------------------------------------------------------------------------------------------------------------------------------------------------------------------------------------------------------------------------------------------------------------------------------------------------------------------------|-------------|
|                          |     | <i>Cross-sectional study</i> —If applicable, describe analytical methods taking account of sampling strategy                                                                                                                                                                                                                                                                                                  |             |
|                          |     | (e) Describe any sensitivity analyses                                                                                                                                                                                                                                                                                                                                                                         |             |
| <b>Results</b>           |     |                                                                                                                                                                                                                                                                                                                                                                                                               |             |
| Participants             | 13* | (a) Report numbers of individuals at each stage of study—eg numbers potentially eligible, examined for eligibility, confirmed eligible, included in the study, completing follow-up, and analysed<br>(b) Give reasons for non-participation at each stage<br>(c) Consider use of a flow diagram                                                                                                               | 9           |
| Descriptive data         | 14* | (a) Give characteristics of study participants (eg demographic, clinical, social) and information on exposures and potential confounders<br>(b) Indicate number of participants with missing data for each variable of interest<br>(c) <i>Cohort study</i> —Summarise follow-up time (eg, average and total amount)                                                                                           | 9, 11<br>12 |
| Outcome data             | 15* | <i>Cohort study</i> —Report numbers of outcome events or summary measures over time<br><i>Case-control study</i> —Report numbers in each exposure category, or summary measures of exposure<br><i>Cross-sectional study</i> —Report numbers of outcome events or summary measures                                                                                                                             | 12-14       |
| Main results             | 16  | (a) Give unadjusted estimates and, if applicable, confounder-adjusted estimates and their precision (eg, 95% confidence interval). Make clear which confounders were adjusted for and why they were included<br>(b) Report category boundaries when continuous variables were categorized<br>(c) If relevant, consider translating estimates of relative risk into absolute risk for a meaningful time period | 12          |
| Other analyses           | 17  | Report other analyses done—eg analyses of subgroups and interactions, and sensitivity analyses                                                                                                                                                                                                                                                                                                                | 13-14       |
| <b>Discussion</b>        |     |                                                                                                                                                                                                                                                                                                                                                                                                               |             |
| Key results              | 18  | Summarise key results with reference to study objectives                                                                                                                                                                                                                                                                                                                                                      | 14          |
| Limitations              | 19  | Discuss limitations of the study, taking into account sources of potential bias or imprecision. Discuss both direction and magnitude of any potential bias                                                                                                                                                                                                                                                    | 16          |
| Interpretation           | 20  | Give a cautious overall interpretation of results considering objectives, limitations, multiplicity of analyses, results from similar studies, and other relevant evidence                                                                                                                                                                                                                                    | 16-17       |
| Generalisability         | 21  | Discuss the generalisability (external validity) of the study results                                                                                                                                                                                                                                                                                                                                         | 17          |
| <b>Other information</b> |     |                                                                                                                                                                                                                                                                                                                                                                                                               |             |
| Funding                  | 22  | Give the source of funding and the role of the funders for the present study and, if applicable, for the original study on which the present article is based                                                                                                                                                                                                                                                 | 18          |

\*Give information separately for cases and controls in case-control studies and, if applicable, for exposed and unexposed groups in cohort and cross-sectional studies.

**Note:** An Explanation and Elaboration article discusses each checklist item and gives methodological background and published examples of transparent reporting. The STROBE checklist is best used in conjunction with this article (freely available on the Web sites of PLoS Medicine at <http://www.plosmedicine.org/>, Annals of Internal Medicine at <http://www.annals.org/>, and Epidemiology at <http://www.epidem.com/>). Information on the STROBE Initiative is available at [www.strobe-statement.org](http://www.strobe-statement.org).
